# Supplementary material
Source: publisher figshare collection journal article supplement (https://acs.figshare.com/ndownloader/files/3875398)
Supplement: Supplementary file 1 [file 3875398]

## Supporting Information for:

### The formation of highly oxidized multifunctional products in the ozonolysis of cyclohexene

Matti P. Rissanen<sup>\*1</sup>, Theo Kurtén<sup>2</sup>, Mikko Sipilä<sup>1</sup>, Joel A. Thornton<sup>3</sup>, Juha Kangasluoma<sup>1</sup>, Nina Sarnela<sup>1</sup>, Heikki Junninen<sup>1</sup>, Solvejg Jørgensen<sup>4</sup>, Simon Schallhart<sup>1</sup>, Maija K. Kajos<sup>1</sup>, Risto Taipale<sup>1</sup>, Taina Ruuskanen<sup>1</sup>, Tuukka Petäjä<sup>1</sup>, Douglas R. Worsnop<sup>5</sup>, Henrik G. Kjaergaard<sup>4</sup> and Mikael Ehn<sup>1</sup>

<sup>1</sup>Department of Physics, P.O. Box 64, 00014 University of Helsinki, Finland.

<sup>2</sup>Department of Chemistry, P.O. Box 55, 00014 University of Helsinki, Finland.

<sup>3</sup>Department of Atmospheric Sciences, University of Washington, Seattle, WA 98195, USA.

<sup>4</sup>Department of Chemistry, University of Copenhagen, Universitetsparken 5, 2100 Copenhagen Ø, Denmark.

<sup>5</sup>Aerodyne Research Inc., 45 Manning Road, Billerica, MA 01821, USA.

## S1. Experimental

### S1.1. Laboratory investigations

The CI-APi-TOF mass spectrometer (Tofwerk AG, Switzerland), the nitrate chemical ionization scheme and the measurement routines have been described previously<sup>62, 63</sup>. Briefly, the atmospheric pressure sample is introduced to the chemical ionization inlet by 3/4-inch stainless steel tube. In the CI-inlet, sheath flow carries the charged nitrate clusters and an applied electric field introduces the ions into the sample gas flow. The charging is brought about (mainly) by nitrate dimers (i.e.,  $\text{HNO}_3^*\text{NO}_3^-$ ), and adducts between sample molecules and the  $\text{NO}_3^-$  ion form if the bond between the sample molecule and  $\text{NO}_3^-$  is stronger than the bond between  $\text{HNO}_3$  and  $\text{NO}_3^-$ . Contrary to a previous publication<sup>62</sup> the ionizing radiation in the CI-inlet was provided by a Hamamatsu L9490 soft X-ray photoionizer, which has been tested against the more commonly applied Americium 241 radioactive charger and has been found to give consistent results.

The ozonolysis reactions ( $\text{C}_6\text{H}_{10}$ ,  $\text{C}_6\text{D}_{10}$  and *cis*-6-nonenal) were investigated in two borosilicate glass flow tube reactors (205 cm long/4.7 cm i.d. and 63 cm long/4.0 cm i.d.) coupled to a nitrate CI-APi-TOF mass spectrometer (see Figure S1). The reagents were brought into the flow tubes with 0.4 cm i.d. Nylon or Teflon tubing, connected to the reactor by a 1 cm i.d. cross Swagelok tube fitting and located in a 0.7 cm i.d. contraction, at about 5 cm upstream of the flow reactor. All experiments were performed at room temperature ( $T = 293 \pm 3$  K) and at ambient pressure using nitrogen ( $\text{N}_2$ ) or synthetic air ( $\text{N}_2$  and  $\text{O}_2$ ) as the bath gas. Generally the volumetric flow rate was adjusted to  $11 \text{ dm}^3 \text{ min}^{-1}$ , which resulted in about 19 s and

36 4 s residence times in the larger and smaller flow reactors, respectively. The gas flow velocities inside the  
 37 flow tubes were varied in few of the experiments to inspect its possible effect on the ELVOC product  
 38 distributions obtained. All experiments were performed under laminar flow conditions.

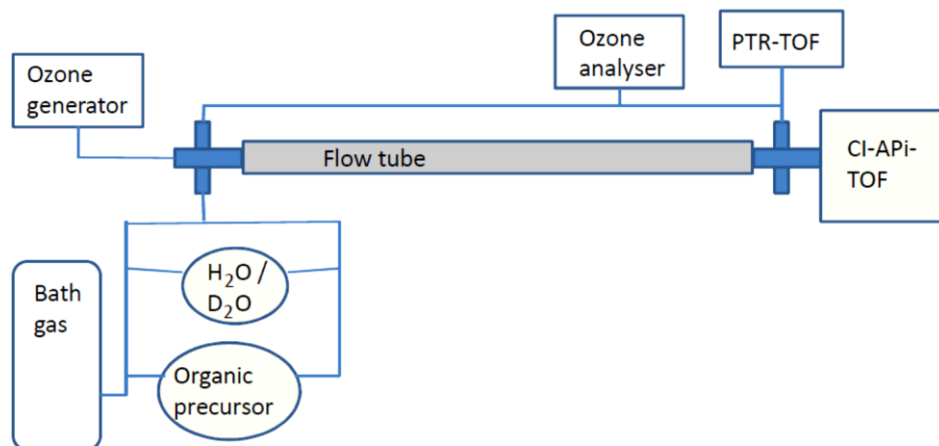

39  
 40  
 41 **Figure S1** Simplified schematic of the experimental setup.

42  
 43 The concentration of cyclohexene in the gas flow was generally estimated from the vapor pressure of the  
 44 precursor and the measured gas flows, but in some of the experiments the concentrations were directly  
 45 determined using a PTR-TOF-MS (Proton Transfer Reaction Time-of-Flight Mass Spectrometer). The PTR-  
 46 TOF-MS instrument consists of a proton transfer reaction (PTR) ion source and reaction chamber (Ionicon  
 47 Analytik GmbH, Austria), where the VOCs of the sample air are ionized by hydronium ions ( $\text{H}_3\text{O}^+$ ), and  
 48 which is coupled to a time-of-flight mass spectrometer (Tofwerk AG, Switzerland). A detailed description of  
 49 the method can be found in<sup>64, 65</sup>. For the experiments, the PTR-TOF-MS was calibrated (see Taipale et al.<sup>66</sup>  
 50 for details about the calibration set up) with a calibration gas mixture (Apel-Riemer Environmental Inc.,  
 51 USA) consisting of 16 different VOCs that was diluted with air purified by a catalytic converter. Ozone ( $\text{O}_3$ )  
 52 concentration was measured concomitantly from the inflow and outflow of the flow reactor by an ozone  
 53 analyzer (Thermo Scientific Model 49). Water ( $\text{H}_2\text{O}$  or  $\text{D}_2\text{O}$ ) was added to the gas flow by bubbling a  
 54 variable part of the bath gas flow through a water reservoir. The amount of water in the gas flow was not  
 55 quantified further. The various types of experiments performed have been described in Table S1.

62 **Table S1** Description of the experiments performed.

| Reagent               | Reactor used                | Volumetric flow, flow velocity, residence time / $\text{dm}^3 \text{min}^{-1}$ , $\text{m s}^{-1}$ , s | Bath gas                    | $^a[\text{O}_3]$ range / $10^{12}$ molecule $\text{cm}^{-3}$ | Added water; $\text{H}_2\text{O}$ or $\text{D}_2\text{O}$ | [Alkene] range / $10^{14}$ molecule $\text{cm}^{-3}$ |
|-----------------------|-----------------------------|--------------------------------------------------------------------------------------------------------|-----------------------------|--------------------------------------------------------------|-----------------------------------------------------------|------------------------------------------------------|
| Cyclohexene           | <sup>b</sup> long and short | 11.4-15.6, 0.11-0.2, 4-19                                                                              | Synthetic air, $\text{N}_2$ | 0.01-1.97                                                    | $\text{H}_2\text{O}$ / $\text{D}_2\text{O}$               | 0.7-96.0                                             |
| Cyclohexene d10       | long                        | 11.4-21.4, 0.11-0.2, 13-19                                                                             | Synthetic air, $\text{N}_2$ | 0.01-1.97                                                    | $\text{H}_2\text{O}$ / $\text{D}_2\text{O}$               | 0.44-14.7                                            |
| <i>cis</i> -6-nonenal | long and short              | 5-11.5, 0.11-0.15, 4-19                                                                                | Air, $\text{N}_2$           | 0.01-2.46                                                    | - / $\text{D}_2\text{O}$                                  | 0.05-3.6                                             |

63 <sup>a</sup>Concentration given by Thermo Scientific Model 49 Ozone Analyzer. <sup>b</sup>Long = 205 cm, 4.7 cm i.d. reactor;  
64 short = 63 cm, 4.0 i.d. reactor.

65

66 Experiments were conducted under increasingly oxidizing conditions that enabled studying the oxidation  
67 reactions further. During the experiments, more  $\text{O}_3$  and organic precursor were added to the gas flow, which  
68 resulted in higher concentrations of radicals and intermediates in the mixture, and correspondingly higher  
69 probabilities for secondary reactions of the radicals formed. This was done in order to inspect the outcome of  
70 peroxy radical reactions (i.e.,  $\text{RO}_2 + \text{R}'\text{O}_2$ , where  $\text{R}' = \text{H}$  or an alkyl-type group, possibly  $\text{R} = \text{R}'$ ), and to  
71 reach conditions where the products of the  $\text{RO}_2 + \text{RO}_2$  reaction can be seen with high enough signals for  
72 unambiguous identification.

73

## 74 S1.2. Chemicals

75

76 The chemicals cyclohexene (*c*- $\text{C}_6\text{H}_{10}$ , 99.0%), deuterated cyclohexene (*c*- $\text{C}_6\text{D}_{10}$ , 98%), *cis*-6-nonenal  
77 ( $\text{CH}_3\text{CH}_2\text{CH}=\text{CH}(\text{CH}_2)_4\text{CHO}$ , 92.0%) and deuterated water ( $\text{D}_2\text{O}$ , 99.9%) were obtained from the Aldrich  
78 chemical company. The water ( $\text{H}_2\text{O}$ ) used was deionized and filtered with Millipore. The gases, nitrogen ( $\text{N}_2$ ,  
79 cryogenic supply and 6.0 scientific grade, 99.999% and 99.9999%, respectively) and synthetic air ( $\text{N}_2$  and  $\text{O}_2$ ,  
80 99.999%) were obtained from AGA. Ozone ( $\text{O}_3$ ) was produced by a commercial ozone generator Dasibi  
81 1008-PC, either from synthetic air or from pressurized and filtered air. All the chemicals were used without  
82 further purification.

83

## 84 S1.3. Uncertainties

85

86 It should be pointed out that the ELVOC yield determined here is very sensitive to the calibration factor used,  
87 and thus the CI-API-TOF was calibrated with sulfuric acid ( $\text{H}_2\text{SO}_4$ ) by producing a known amount of it from  
88 a reaction of  $\text{SO}_2$  with OH-radicals,  $\text{O}_2$  and  $\text{H}_2\text{O}$  (more on calibration below) [see ref.<sup>91</sup>, and references  
89 therein]. However, the ion transmission efficiencies for ELVOCs and  $\text{H}_2\text{SO}_4$  most likely differ, and thus

using a calibration coefficient determined for  $\text{H}_2\text{SO}_4$  adds uncertainty to the values obtained. Other sources of uncertainty result mainly from calibration of mass flow controllers (i.e., gas flow rates and their calculations), ELVOC wall loss rate(-s), impurities in gas flows capable of reacting with the ELVOC precursors (e.g.,  $\text{HO}_2$  and  $\text{RO}_2$  radicals produced from impurities) and uncertainties in determined  $\text{O}_3$  concentrations. By adding the different uncertainties with a propagation of error method, one arrives at an estimated total uncertainty of the ELVOC yield of  $(4.5 \pm 3.8)\%$  for the  $\text{C}_6\text{H}_{10} + \text{O}_3$  reaction (i.e., 80% estimated overall uncertainty; more on yield below).

#### S1.4. Water addition

We cannot detect individual  $\text{H}_2\text{O}$  (or  $\text{D}_2\text{O}$ ) directly with the experimental setup, but we have an indirect proxy for the water abundance in the system; the  $\text{H}_2\text{O}^+\text{NO}_3^-$  complex (or equivalently  $\text{D}_2\text{O}^+\text{NO}_3^-$  when using  $\text{D}_2\text{O}$ ). We found no evidence that indicates a role for water in the ELVOC formation. This is illustrated in Figure S2, where a few of the major ELVOC signals obtained are plotted together with the  $\text{H}_2\text{O}^+\text{NO}_3^-$  complex signal for one set of these experiments.

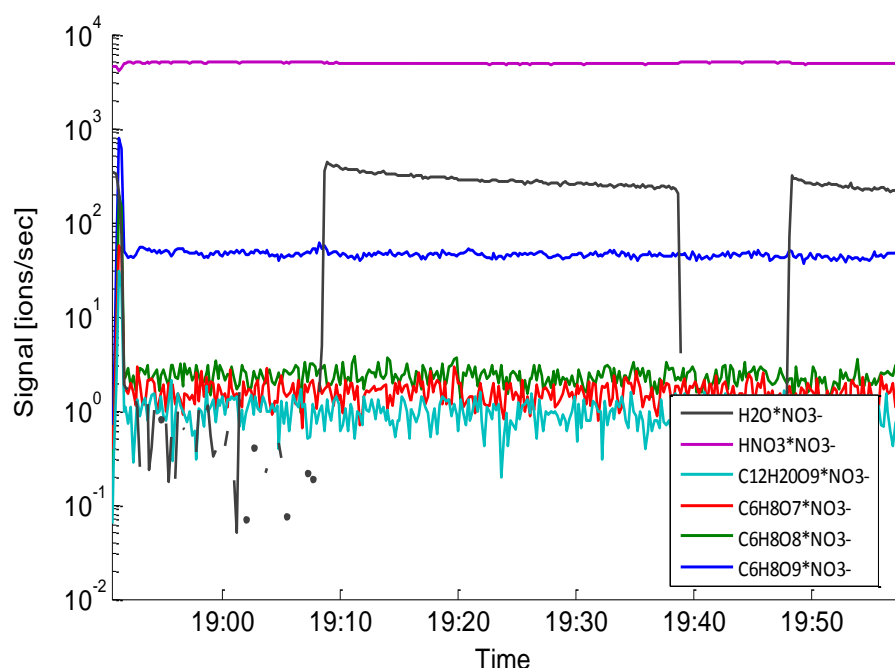

**Figure S2** The identified ELVOC signals remain constant when  $\text{H}_2\text{O}$  is added to the gas flow. The addition can be seen from the sharp rise of the water-nitrate-ion complex signal ( $\text{H}_2\text{O}^+\text{NO}_3^-$ ) at 79.9989 Th. The ELVOC signals shown are:  $\text{C}_6\text{H}_8\text{O}_9$ ,  $\text{C}_6\text{H}_8\text{O}_8$  and  $\text{C}_6\text{H}_8\text{O}_7$ , detected as clusters with  $\text{NO}_3^-$  at 286.0052 Th, 270.0103 Th and 254.0154 Th, respectively.

By adding  $\text{D}_2\text{O}$  to the gas flow, instead of  $\text{H}_2\text{O}$ , we can get information on the chemical identity of the products formed, as acidic groups will exchange hydrogens easily<sup>29, 85-87</sup>. The deuterium atom is one mass

unit heavier than the hydrogen atom, and thus the identified ELVOC should shift one mass unit in the spectra for every exchangeable hydrogen atom in the ELVOC molecule. These investigations suggested that the product observed at 254.0154 Th ( $C_6H_8O_7$ ) is formed through one  $O_2$  addition step earlier intermediate than the 270.0103 Th and 286.0052 Th peaks (i.e.,  $C_6H_8O_8$  and  $C_6H_8O_9$ ). This is because the 254.0154 Th peak was observed to shift only by two mass units, whereas the 270.0103 Th and 286.0052 Th peaks shifted by 3 mass units, indicating that 2 and 3 hydrogens were exchanged by  $D_2O$  addition to the reaction mixture, respectively (see Figures 1b and S3). This further suggests that the third hydroperoxide functionality is not yet formed in the 254.0154 Th's parent compound, the  $C_6H_9O_8$  peroxy radical (see Scheme 2).

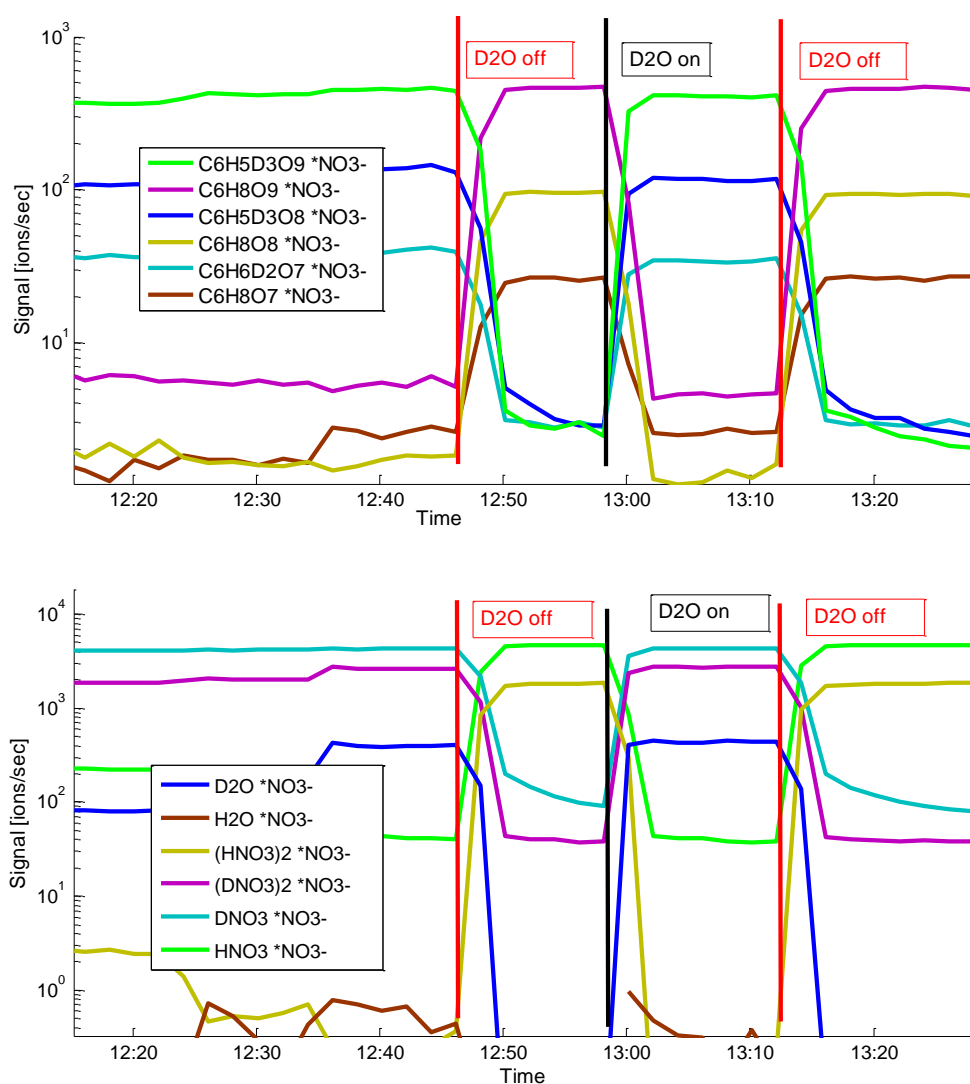

**Figure S3** An example of how cyclohexene ozonolysis derived ELVOC signals shift in mass after adding  $D_2O$  to the gas flow (e.g.,  $C_6H_8O_9 \rightarrow C_6H_5D_3O_9$ ). Also the charger nitrate clusters shift according to the amount of acidic hydrogens in the clusters.

### 129 **S1.5. Deuterated cyclohexene, C<sub>6</sub>D<sub>10</sub>**

130

131 The ELVOCs observed in the ozonolysis of deuterated cyclohexene were given in Table 1 and Figure 3, and  
132 the general monomer formation mechanism is believed to be analogous to the non-substituted cyclohexene  
133 ozonolysis system (see Scheme 2). By inspecting the mechanism and the peaks identified, it is observed that  
134 multiple D-atoms are exchanged to H-atoms before detection in both of the main products, i.e., the ELVOC  
135 product at 275.0417 Th is detected with a composition C<sub>6</sub>D<sub>5</sub>H<sub>3</sub>O<sub>8</sub> (corresponding to C<sub>6</sub>H<sub>8</sub>O<sub>8</sub> in the C<sub>6</sub>H<sub>10</sub> +  
136 O<sub>3</sub> reaction) and the 293.0491 Th product is observed to have a composition C<sub>6</sub>D<sub>7</sub>HO<sub>9</sub> (corresponding to  
137 C<sub>6</sub>H<sub>8</sub>O<sub>9</sub> in the C<sub>6</sub>H<sub>10</sub> + O<sub>3</sub> reaction). In addition, the C<sub>6</sub>D<sub>5</sub>H<sub>3</sub>O<sub>9</sub> at 291.0366 Th, the C<sub>6</sub>D<sub>7</sub>HO<sub>8</sub> at 277.0542 Th  
138 and the fully deuterated ELVOCs at 278.0605 Th (C<sub>6</sub>D<sub>8</sub>O<sub>8</sub>) and 294.0554 Th (C<sub>6</sub>D<sub>8</sub>O<sub>9</sub>) are seen but with  
139 reduced intensity.

140

141 By looking at the Figures 1a and 3a it is clear that the distribution of oxidation products has changed upon  
142 exchanging H-atoms with D-atoms in the cyclohexene precursor molecule. The deuterated ELVOC, C<sub>6</sub>D<sub>8</sub>O<sub>9</sub>  
143 (a major part of it is seen as C<sub>6</sub>D<sub>7</sub>HO<sub>9</sub> in the spectra at 293.0491 Th and less as C<sub>6</sub>D<sub>5</sub>H<sub>3</sub>O<sub>9</sub> at 291.0366 Th),  
144 corresponding to the major monomer ELVOC detected in the C<sub>6</sub>H<sub>10</sub> + O<sub>3</sub> reaction (i.e., 286.0052 Th,  
145 C<sub>6</sub>H<sub>8</sub>O<sub>9</sub>), is seen with much lower intensity (see Figures 1 and 3 for the spectra), as expected due to slower  
146 D-transfer reactions compared to H-transfer reactions, and also due to more probable tunneling for the lighter  
147 H-atoms<sup>84</sup>. In fact, the major monomer product observed in the C<sub>6</sub>D<sub>10</sub> + O<sub>3</sub> reaction is C<sub>6</sub>D<sub>5</sub>O<sub>8</sub>H<sub>3</sub>, detected at  
148 275.0417 Th, and corresponding to the 270.0103 Th product of the C<sub>6</sub>H<sub>10</sub> + O<sub>3</sub> reaction (C<sub>6</sub>H<sub>8</sub>O<sub>8</sub>); with three  
149 D-atoms exchanged prior to detection. Also, the product distribution has shifted toward the middle product  
150 due to hindered atom transfer of D in comparison with H.

151

### 152 **S1.6. Dimers**

153

154 When the O<sub>3</sub> and cyclohexene concentrations are increased enough, dimers appear in the spectra (Table 1,  
155 Figures 1 and 3). The dimers in this context are not dimers in the most conventional sense, that is, they're not  
156 formed by two similar pieces sticking together by Van der Waals forces and hydrogen bonds. Instead, they  
157 are distinctive species formed in the recombination and cross-combination reactions of different RO<sub>2</sub>  
158 radicals<sup>12</sup>. This can be seen from, for example, their elemental compositions, as the dimers have more than  
159 double the amount of hydrogens than the monomer species (i.e., they're not clusters of the same species).

160

161 In dimers the effect of OH-chemistry (which runs in parallel with ozonolysis, if no scavengers have been  
162 applied) is seen to interfere as we detect dimer compounds that apparently have not lost H-atoms during the  
163 oxidation sequence (e.g., C<sub>12</sub>H<sub>20</sub>O<sub>x</sub> species in Table 1). This indicates that there are some RO<sub>2</sub> species  
164 reacting which have more hydrogens than the original C<sub>6</sub>H<sub>10</sub> parent molecule, which is in contrast with

165 Scheme 2 where the first H-atom is lost in the prompt VHP decomposition. This can be explained by OH-  
166 chemistry, as the OH addition to the double bond of cyclohexene leads to a carbon-centered radical that has  
167 one H- and O-atom more than the unsaturated parent compound; cyclohexene ( $C_6H_{10}$ ) will be converted to a  
168 carbon-centered hydroxycyclohexyl radical ( $\bullet C_6H_{10}OH$ ) that adds an  $O_2$  molecule and forms an oxygen-  
169 centered hydroxycyclohexyl peroxy radical ( $\bullet O_2C_6H_{10}OH$ ;  $C_6H_{11}O_3$ ). When these radicals react with the  
170 peroxy radical intermediates from Scheme 2, we obtain the dimer products with a carbon and hydrogen  
171 composition of  $C_{12}H_{20}$  (see Figure 1 and Table 1).

172

173 Also another type of dimers in Table 1 might cause confusion at first - those with one less carbon atom in the  
174 elemental formula, i.e.,  $C_{11}$ -compounds. As shown in the current and previous work<sup>14, 17, 20</sup>, H-shifts leading  
175 to carbon-centered acyl-type radicals may lead to breakage of the carbon backbone by ejecting a CO-  
176 fragment. In cyclohexene ozonolysis, a  $C_5$  carbon-centered alkyl-type radical is created concurrently  
177 (Scheme 2), which can add an  $O_2$  molecule, forming a new  $C_5$  peroxy radical, and react with the abundant  $C_6$   
178 peroxy radicals creating the  $C_{11}$ -dimers observed.

179

180 The  $C_6H_{10} + O_3$  dimer deuteration experiments using  $D_2O$  mostly lead to two hydrogens being exchanged,  
181 but also to three and four hydrogen exchanges in the heaviest dimer products observed, consistent with the  
182 peroxide structures [i.e., ROOR or  $R(O)OO(O)R$ ] formed by recombination of two peroxy radicals  
183 containing hydroperoxide functionalities. Also the addition of  $D_2O$  to the  $C_6D_{10} + O_3$  system provided  
184 valuable information: the deuterated dimers had exchanged their labile deuteriums to hydrogens prior to  
185 detection, but by adding  $D_2O$  to the bath gas flow these hydrogens were observed to exchange back to  
186 deuteriums. In this way it was found that the deuterated dimers contained one to three exchangeable  
187 hydrogens, which is less than what was observed for the  $C_6H_{10} + O_3$  case.

188

189 The two most intense dimer peaks detected in the  $C_6D_{10} + O_3$  reaction were  $C_{12}D_{18}H_2O_7NO_3^-$  (356.2223 Th)  
190 and  $C_{12}D_{16}H_2O_{10}NO_3^-$  (400.1788 Th) (Table 1). Note that the  $C_{12}D_{18}H_2O_7NO_3^-$  product has altogether 20 H +  
191 D atoms and indicates interference by OH chemistry, as explained above. The deuterated dimers exchanged  
192 fewer hydrogens than the non-deuterated dimers, which is exactly what is expected when comparing reaction  
193 products that have been formed by hydrogen vs deuterium -shift reactions. Less hydroperoxide  
194 functionalities are effectively formed through the slower D-shift reactions. However, it is not certain that the  
195  $NO_3^-$  will cluster in exactly the same way with the deuterated ELVOC as with the non-deuterated ELVOC  
196 molecules, although there is currently no reason to suspect otherwise.

197

198 It's also worth emphasizing that the dimers have on average higher H/C (or D/C) than the monomers, which  
199 indicates that their formation is in competition with the unimolecular termination pathways (i.e., ejecting OH  
200 and  $HO_2$  radicals) forming the monomer compounds.

### S1.7. *cis*-6-nonenal ozonolysis

*Cis*-6-nonenal ozonolysis produces a similar Criegee Intermediate as the cyclohexene ozonolysis (CI 1 in Scheme S1 and CI in Scheme 1, respectively), albeit with different internal excitation and lesser yield due to the concomitant formation of another type of three carbon Criegee Intermediate (CI 2 in scheme S1). The *cis*-6-nonenal ozonolysis was observed to lead to a similar monomer ELVOC distribution as the cyclohexene ozonolysis (Figure 1a and Figure 3c), consistent with the proposed formation mechanism.

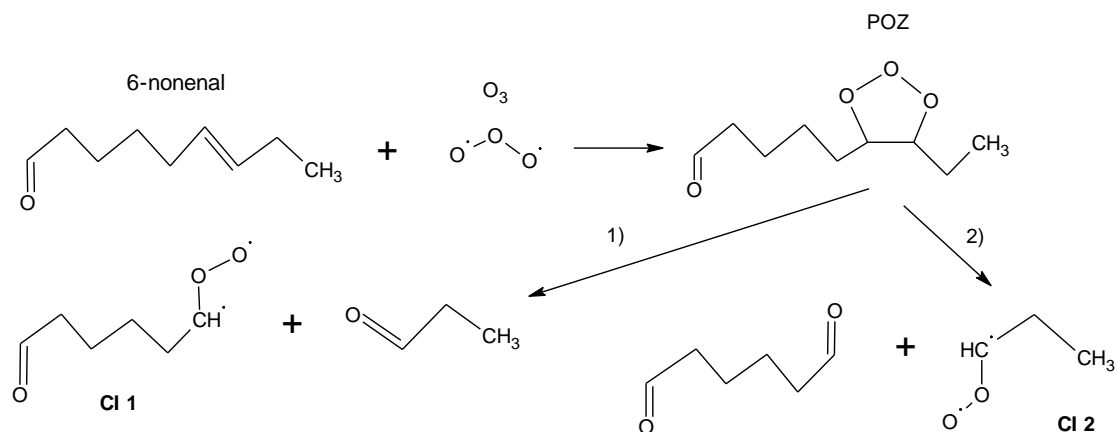

**Scheme S1** *cis*-6-nonenal ozonolysis leads to two different Criegee intermediates CI 1 and CI 2, through  $O_3$  addition, primary ozonide (POZ) formation and decomposition.

The nonenal ELVOC deuteration experiments did not yield a quantitative H/D exchange as can be seen in Figure S4. Most likely the residual  $H_2O$  in the system prevented from obtaining a complete H/D exchange. Another explanation could be the formation of isomers with different functional groups that are not able to exchange hydrogens. However, the charger nitrate ion distribution presented in Figure S4c, which experiences the same incomplete H/D exchange, indicates that there are still plenty labile H atoms in the system (probably due to residual  $H_2O$ ) capable of exchanging D to H, and thus explains the observed product distribution.



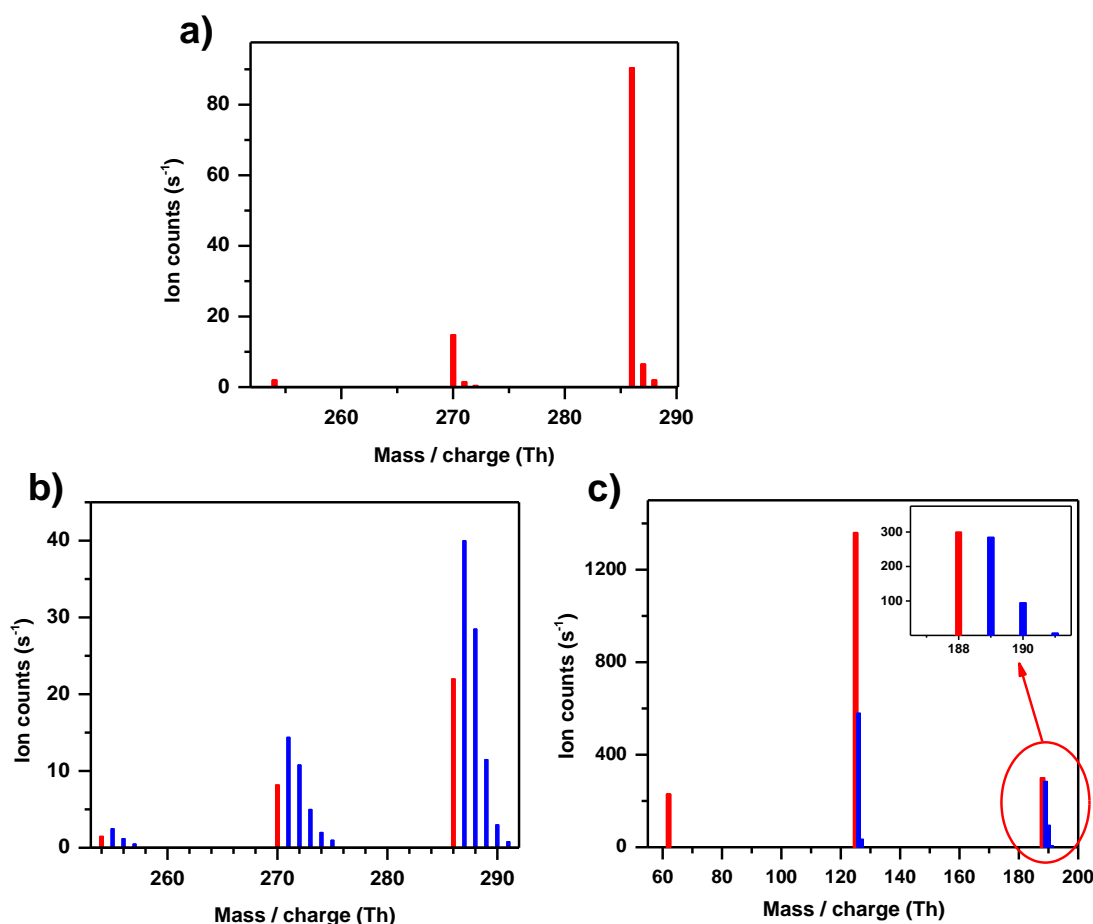

**Figure S4a-S4c** ELVOC spectra from *cis*-6-nonenal experiments. **a)** *cis*-6-nonenal ozonolysis ELVOC spectrum (Figure 3c in manuscript text) and **b)** the same nonenal ELVOCs after adding  $D_2O$  to the gas mixture. **c)** Charger nitrate ion clusters also exchange their acidic hydrogens, i.e.,  $HNO_3^+NO_3^- \rightarrow DNO_3^+NO_3^-$  and  $(HNO_3)_2^+NO_3^- \rightarrow HNO_3DNO_3^+NO_3^-$ ,  $(DNO_3)_2^+NO_3^-$ ; the inset in the upper right corner shows the incomplete H/D-exchange of the nitrate trimer charger ion. Blue color indicates peaks with D atoms.

### S1.8. ELVOC molar yield

The detection efficiency of the nitrate CI-APi-TOF to ELVOC was very recently estimated to be similar to the detection efficiency of  $H_2SO_4$ <sup>12</sup>, and thus we used a calibration factor obtained for  $H_2SO_4$  to convert the measured ion signals into concentrations. Hence, the CI-APi-TOF was calibrated by generating a known amount of  $H_2SO_4$  from a  $SO_2 + OH (+ O_2 + H_2O)$  reaction<sup>91</sup>; OH-radicals were photochemically produced and the  $H_2SO_4$  subsequently formed is readily measured by the nitrate CI-APi-TOF<sup>62</sup>. The calibration resulted in a factor of  $C_{H_2SO_4} = 1.94 \times 10^{10}$  molecule  $cm^{-3}$ .

239 In addition to the calibration factor, one needs to take into account the amount of available charge carriers  
 240 able to transfer the charge to the target species. In practice this was done by normalizing the product ion  
 241 signals obtained by the amount of principal charge carriers {nitrate ion ( $\text{NO}_3^-$ ) and its dimer ( $\text{HNO}_3^*\text{NO}_3^-$ )  
 242 and trimer  $[(\text{HNO}_3)_2^*\text{NO}_3^-]$ } in the gas mixture. With these procedures one arrives at an equation (eq.S1) for  
 243 individual ELVOC concentration:

$$245 \quad [\text{ELVOC}] = C_{\text{H}_2\text{SO}_4} \times \frac{[\text{ELVOC}x\text{NO}_3^-]}{[\text{NO}_3^-] + [\text{HNO}_3\text{NO}_3^-] + [(\text{HNO}_3)_2\text{NO}_3^-]} \quad (\text{eq.S1})$$

246  
 247 The yield measurements were performed under pseudo-steady-state conditions, i.e., under conditions where  
 248 the observed ELVOC signals remain effectively constant for as long as the experimental conditions remain  
 249 unchanged in the flow reactor system, e.g., from several minutes to up to an hour in comparison with 4 to 20  
 250 s residence time in the flow tube (see Figure S2 and S3). This was accomplished by adjusting the reagent  
 251 concentrations in the gas flow and letting the system relax into a balance where the observed rate of change  
 252 of the gas composition was zero. For cyclohexene ELVOCs, under these conditions, the production term is  
 253 equal to the cyclohexene ozonolysis rate {i.e.,  $k_{\text{C}_6\text{H}_{10} + \text{O}_3} \times [\text{O}_3][\text{CH}]$ , corrected by the ELVOC molar yield  
 254 ( $Y_{\text{ELVOC}}$ )} and the loss happens by wall reaction, but potentially also by other ways not easily separable from  
 255 the experimental data. For practical purposes, the loss processes can be grouped under a common first-order  
 256 loss rate ( $k_{\text{LOSS}}$ ), provided the yield measurements are performed under conditions where the observed  
 257 ELVOC yield is first-order with respect to the production term. The pseudo-steady-state can then be  
 258 presented as:

$$260 \quad d[\text{ELVOC}] / dt = k_{\text{C}_6\text{H}_{10} + \text{O}_3} \times Y_{\text{ELVOC}} \times [\text{O}_3][\text{CH}] - k_{\text{LOSS}} \times [\text{ELVOC}] \approx 0 \quad (\text{eq.S2})$$

261  
 262 As ELVOCs have by definition a very low vapor pressure, their wall losses in a flow tube are expected to be  
 263 substantial. Fortunately, their extremely low vapor pressures also mean that no significant re-evaporation of  
 264 the ELVOC is expected. In order to estimate the fraction of ELVOCs lost to the walls of the flow tube, a  
 265 diffusion limited first-order wall loss rate ( $k_{\text{WALL}} = 3.65 D / r^2$ , where  $r$  is the radius of the flow reactor) was  
 266 calculated by applying a similar ELVOC diffusion constant as used by Ehn et al.<sup>12</sup> for  $\alpha$ -pinene derived  
 267 ELVOCs ( $D = 0.05 \text{ cm}^2 \text{ s}^{-1}$ ). The normalized and calibrated ion counts obtained for the ELVOC were then  
 268 corrected by the calculated wall loss fraction and the final yield determined with:

$$270 \quad Y_{\text{ELVOC}} = (k_{\text{LOSS}} \times [\text{ELVOC}]) / (k_{\text{C}_6\text{H}_{10} + \text{O}_3} \times [\text{O}_3][\text{CH}]) \quad (\text{eq.S3})$$

271  
 272 where  $k_{\text{C}_6\text{H}_{10} + \text{O}_3} = 7.4 \times 10^{-17} \text{ cm}^3 \text{ molecule}^{-1} \text{ s}^{-1}$  was taken from the most recent determination<sup>33</sup>. Only the  
 273 peaks with identified elemental compositions were included in the ELVOC yield calculations (Table 1), and

274 hence, the quoted value is a lower limit for the ELVOC yield from cyclohexene ozonolysis system.  
275 Nevertheless, even by inspection of Figure 1a it's clear that these peaks contain most of the product  
276 ELVOCs and by omitting a part of the lower intensity peaks is not expected to lead to a large error, probably  
277 at most around 10% of the determined value.

278

279 The yield of ELVOCs is seen to increase together with the product of [cyclohexene] and [O<sub>3</sub>] as expected<sup>12</sup>  
280 (Figure 4), and the yield determined for the C<sub>6</sub>H<sub>10</sub> + O<sub>3</sub> reaction system was (4.5 ± 0.2)%, with the  
281 uncertainty reported as one standard error of the fit. The overall uncertainty of this value was estimated as  
282 ±80%, and was obtained by the propagation of error method. It should be stressed that the yield determined  
283 in this work corresponds only to a few percent of the total product yield and does not seek to explain the  
284 formation of already well-established major products of the reaction given in previous publications<sup>29-57</sup>.

285

### 286 **S1.9. Relation to previous studies**

287

288 Due to its structural similarity with the biogenic monoterpenes the cyclohexene ozonolysis system has  
289 attracted considerable attention. It has been a model system for deriving ozonolysis mechanisms and gaining  
290 insight into ambient SOA formation processes<sup>33, 35, 49, 52-54</sup>. The major products of the C<sub>6</sub>H<sub>10</sub> + O<sub>3</sub> reaction  
291 have been obtained previously, with various acids, diacids and oxo-acids identified in the gas- and particle  
292 phases, for example, adipic and glutaric acids have been frequently cited<sup>33, 34, 49, 51, 52, 56, 57</sup>. The OH-yield of  
293 cyclohexene + O<sub>3</sub> reaction has been determined most recently as 0.47<sup>33</sup> with only a small difference in the  
294 yield measured for the C<sub>6</sub>D<sub>10</sub> + O<sub>3</sub> reaction; OD yield of 0.50<sup>29</sup>.

295

296 The role of radical chemistry in controlling the product distributions in cyclohexene SOA formation was  
297 emphasized by Keywood and co-workers<sup>31</sup>. They provided evidence on the role of acyl peroxy radical [i.e.,  
298 •O-O-C(=O)-R] reactions, which had already previously been suggested to participate in SOA formation<sup>31, 92</sup>.  
299 In the current work, acyl peroxy radicals are seen to be important in ELVOC formation too (Scheme 2).  
300 However, acyl radical reactions (i.e., precursors for acyl peroxy radicals) lead to various different types of  
301 products as well, for example, they're known to be prone to dissociation by losing a CO fragment<sup>20, 33, 88</sup>,  
302 which is the reason for C<sub>11</sub>-compounds detected in the dimer product distribution (see discussion above).  
303 Acyl peroxy radical recombination, on the other hand, leads to diacyl peroxides, which Ziemann<sup>32</sup> suggested  
304 as important low volatility nucleating agents in the oxidation of cyclohexene. Nevertheless, the channels  
305 leading to ELVOCs have low yields<sup>12</sup>, and only a small part of the produced acyl radicals will transform into  
306 ELVOCs. Müller et al.<sup>55</sup> found ester products as the possible oligomerizing, and hence, nucleating agents in  
307 cyclohexene ozonolysis, but concluded that other products could be contributing too.

308

Warren et al.<sup>42</sup> observed an increase in cyclohexene SOA yield under humid conditions and attributed this to an increase in aldehyde formation by a sCI + H<sub>2</sub>O reaction. In this work, we see no influence of H<sub>2</sub>O to the ELVOC spectrum obtained, and hence, this increase does not seem to result from ELVOCs reacting. In addition, Müller et al.<sup>55</sup> saw no relative humidity (RH) dependence on product formation. Moreover, according to the most recent previous studies<sup>30, 36</sup> the cyclohexene ozonolysis should not produce a stabilized Criegee intermediate and thus should not react appreciably with water in this system due to its very short lifetime. In a study by Carlsson et al.<sup>33</sup> it was observed that the presence of SO<sub>2</sub> in the cyclohexene ozonolysis gas mixture greatly enhanced particle formation through H<sub>2</sub>SO<sub>4</sub> production and they pointed out that the SOA formation in the cyclohexene ozonolysis system is due to “chemical activation driven dynamics in the vinylhydroperoxide channel”, which is exactly what is inferred from the results of this study too.

Tantamount to the mechanism proposed in this work is the formation of peroxy radicals (RO<sub>2</sub>) by O<sub>2</sub> addition to the carbon centered radicals formed in the hydrogen shift step. While RO<sub>2</sub> radicals have not generally been observed to react with O<sub>2</sub>, the carbon-centered alkyl radicals (R) will be converted to peroxy radicals (R + O<sub>2</sub> → RO<sub>2</sub>) practically instantly in ambient air. Alkyl radicals are known to react with a wide variety of species, while RO<sub>2</sub> mainly react with NO, HO<sub>2</sub> and RO<sub>2</sub><sup>82, 88</sup>. Due to the RO<sub>2</sub> reacting with only a few species, the probability of RO<sub>2</sub> unimolecular reactions (isomerization and fragmentation) significantly increases<sup>93</sup>, especially under pristine atmospheric conditions where [NO] is low.

The arguments previously found to hold for 1,x hydrogen shifts seem to be valid for the ELVOC formation too, e.g., close-by oxygenated functional groups catalyze the process but abstraction from the neighboring carbon atom is generally forbidden due to high ring strain in the transition state<sup>17, 19, 94, 95</sup>. Thus the hydrogen abstractions will most likely occur in places where the hydrogens are weaker bonded due to the electron withdrawing inductive effects of properly situated functional groups. For example, oxygenated groups such as hydroperoxy, carbonyl or hydroxyl in the α-carbon have been observed to lower the H-abstraction barriers significantly<sup>19, 94</sup>. In line with this, the aldehydic hydrogens (i.e., H-atoms in terminal -CHO groups) are generally rather weakly bound and often the easiest to abstract. It is these relatively weak C-H bonds that facilitate the peroxy radical isomerization to a hydroperoxide (commonly noted: RO<sub>2</sub> → QOOH) even at room temperature; a reaction class extensively investigated in combustion<sup>14, 96</sup>. However, the RO<sub>2</sub> isomerization is also in competition with a route leading to HO<sub>2</sub> elimination, and the HO<sub>2</sub> yield has been observed to increase and shift to lower temperatures when the carbon skeleton lengthens<sup>16, 88</sup>.

Ultimately, the formation of ELVOC from cyclohexene seems to be governed by the amount of abstractable hydrogen atoms in the carbon skeleton, which are loosened from the backbone by the presence of nearby oxygenated functional groups. The proposed chain like mechanism starting from ozonolysis leads to the generation of an additional OH-radical on top of the VHP decomposition, and may thus explain, in part,

345 some of the discrepancy observed in the heightened OH-levels over specific forested environments  
346 dominated by biogenic emissions<sup>94, 97, 98</sup>. The proposed mechanism offers another type of explanation without  
347 invoking the recycling mechanisms<sup>94, 98-101</sup>, which likely run in parallel to the reaction sequences described in  
348 the current paper. The mechanism presented here is strictly valid only for cyclohexene ozonolysis, but  
349 similar reaction sequences can be expected to happen in different alkene ozonolysis reactions. For example,  
350 in monoterpene oxidation by O<sub>3</sub> for which C<sub>6</sub>H<sub>10</sub> + O<sub>3</sub> can be considered a surrogate reaction.

351

352

## 353 S2. Quantum chemical calculations

### 354 S2.1. Validation of configurational sampling algorithm

355

356 For the 1,7 hydrogen shift and CO loss reactions of C<sub>6</sub>H<sub>9</sub>O<sub>4</sub>, the ROHF-RCCSD(T)-F12a/VDZ-F12 energy  
357 was calculated for every reactant, transition state (TS) and product conformer (over 100 conformers in total)  
358 in order to test the validity of the sampling method. While the absolute reaction energetics (e.g., energy  
359 difference between transition states and reactants, or reactants and products) predicted by the different  
360 methods differed significantly (by several kcal/mol), the relative energies of different conformers of the same  
361 system (i.e., different torsional conformers of the same reactant, TS or product) were close to each other. The  
362 relative energy is here defined as the energy of a conformer minus that of the lowest-energy conformer of the  
363 same type (reactant, TS or product).

364

365 The average unsigned difference between the ωB97XD/aug-cc-pVTZ and ROHF-RCCSD(T)-F12a/VDZ-  
366 F12 relative energies were 0.24, 0.44, 0.08 and 0.08 kcal/mol for the reactants, H-shift transition states,  
367 products and CO loss transition states, respectively. The largest difference observed was 0.80 kcal/mol, for  
368 one of the H-shift transition states. Even more encouragingly, despite the total number of conformers  
369 exceeding 100, both methods predicted the same conformer to have the lowest energy for all four systems  
370 (reactant, product and two transition states).

371

372 Also the B3LYP/6-31+G(d) relative energies (of the B3LYP-optimized structures) were surprisingly close to  
373 the final ROHF-RCCSD(T)-F12a/VDZ-F12 values, with average unsigned differences of 0.39, 0.58, 0.74  
374 and 0.20 kcal/mol for the reactants, H-shift transition states, products and CO loss transition states,  
375 respectively. The largest difference observed between B3LYP and CCSD(T) relative electronic energies was  
376 1.55 kcal/mol, for one of the reactant structures. This suggests that picking the structures within 2 kcal/mol  
377 of the minimum at the B3LYP/6-31+G(d) level for further calculations is a reasonable strategy for finding  
378 the global minimum-energy structure at the ROHF-RCCSD(T)-F12a/VDZ-F12//ωB97XD/aug-cc-pVTZ  
379 level.

380

## 381 S2.2. TST versus MC-TST

382

383 Table S2 shows the partition functions obtained using only the lowest-energy conformer, or all the  
 384 conformers included. Table S3 shows the rate coefficients obtained using only the lowest-energy conformers  
 385 (as in conventional TST), and using MC-TST.

386

387 **Table S2** The partition functions of the reactants, transition states and products for each reaction.

|                                                             | Lowest-energy conformer <sup>a</sup> |                      |                      |  | Including all conformers <sup>b</sup> |                      |                      |
|-------------------------------------------------------------|--------------------------------------|----------------------|----------------------|--|---------------------------------------|----------------------|----------------------|
| Label                                                       | Q <sub>R</sub>                       | Q <sub>TS</sub>      | Q <sub>P</sub>       |  | Q <sub>R</sub>                        | Q <sub>TS</sub>      | Q <sub>P</sub>       |
| C <sub>6</sub> H <sub>9</sub> O <sub>4</sub> 1,7<br>H-shift | 1.4×10 <sup>10</sup>                 | 4.5×10 <sup>8</sup>  | 1.7×10 <sup>9</sup>  |  | 1.6×10 <sup>11</sup>                  | 1.2×10 <sup>9</sup>  | 6.5×10 <sup>10</sup> |
| C <sub>6</sub> H <sub>9</sub> O <sub>4</sub><br>CO loss     | 1.7×10 <sup>9</sup>                  | 1.6×10 <sup>10</sup> | -                    |  | 6.5×10 <sup>10</sup>                  | 1.5×10 <sup>11</sup> | -                    |
|                                                             |                                      |                      |                      |  |                                       |                      |                      |
| C <sub>6</sub> H <sub>9</sub> O <sub>6</sub> 1,8<br>H-shift | 2.6×10 <sup>10</sup>                 | 4.1×10 <sup>9</sup>  | 2.1×10 <sup>11</sup> |  | 2.6×10 <sup>10</sup>                  | 9.5×10 <sup>9</sup>  | 3.1×10 <sup>12</sup> |
| C <sub>6</sub> H <sub>9</sub> O <sub>6</sub> 1,7<br>H-shift | 2.6×10 <sup>10</sup>                 | 2.7×10 <sup>9</sup>  | 9.9×10 <sup>10</sup> |  | 2.6×10 <sup>11</sup>                  | 7.0×10 <sup>9</sup>  | 1.5×10 <sup>11</sup> |
| C <sub>6</sub> H <sub>9</sub> O <sub>6</sub><br>CO loss     | 2.1×10 <sup>11</sup>                 | 7.8×10 <sup>10</sup> | -                    |  | 3.1×10 <sup>12</sup>                  | 1.5×10 <sup>13</sup> | -                    |
|                                                             |                                      |                      |                      |  |                                       |                      |                      |
| C <sub>6</sub> H <sub>9</sub> O <sub>8</sub> 1,7<br>H-shift | 2.3×10 <sup>12</sup>                 | 1.5×10 <sup>11</sup> | 2.6×10 <sup>12</sup> |  | 5.4×10 <sup>13</sup>                  | 1.9×10 <sup>11</sup> | 4.6×10 <sup>13</sup> |
| C <sub>6</sub> H <sub>9</sub> O <sub>8</sub> 1,4<br>H-shift | 2.3×10 <sup>12</sup>                 | 5.9×10 <sup>11</sup> | -                    |  | 5.4×10 <sup>13</sup>                  | 2.5×10 <sup>13</sup> | -                    |
| C <sub>6</sub> H <sub>9</sub> O <sub>8</sub> 1,5<br>H-shift | 2.3×10 <sup>12</sup>                 | 6.4×10 <sup>11</sup> | -                    |  | 5.4×10 <sup>13</sup>                  | 1.1×10 <sup>12</sup> | -                    |
| C <sub>6</sub> H <sub>9</sub> O <sub>8</sub> 1,6<br>H-shift | 2.3×10 <sup>12</sup>                 | 4.8×10 <sup>11</sup> | 4.4×10 <sup>11</sup> |  | 5.4×10 <sup>13</sup>                  | 1.4×10 <sup>12</sup> | 3.9×10 <sup>13</sup> |

388 <sup>a</sup>The partition function of the lowest energy conformer (Q), and, <sup>b</sup>the partition function using all conformers  
 389 of the reactant (R), transition state (TS) and product (P) for each reaction. The partition function is a product  
 390 of the rotational and vibrational partition function. The ratios of Q<sub>elec</sub> and Q<sub>trans</sub> are assumed to be equal to 1  
 391 for all reaction steps studied here, and therefore cancel out in the rate coefficient calculations. Note that the  
 392 reactant of the CO loss reaction is the same as the product of one of the H-shift reactions.

393

394 **Table S3** Calculated rate coefficients for the different H-shift and CO loss reactions.

395

|                                              |     | Barriers (kcal/mol) |         | $k_{\text{TST}} (\text{s}^{-1})^a$ |                       | $k_{\text{MCTST}} (\text{s}^{-1})^a$ |                       |                      |
|----------------------------------------------|-----|---------------------|---------|------------------------------------|-----------------------|--------------------------------------|-----------------------|----------------------|
| Reaction                                     |     | Forward             | Reverse | Forward                            | Reverse               | Forward                              | Reverse               | $\kappa$ (tunneling) |
| C <sub>6</sub> H <sub>9</sub> O <sub>4</sub> | 1,7 | 15.6                | 14.7    | $7.9 \times 10^{-1}$               | 29                    | $1.7 \times 10^{-1}$                 | 2.0                   | 44                   |
| H-shift                                      |     |                     |         |                                    |                       |                                      |                       |                      |
| C <sub>6</sub> D <sub>9</sub> O <sub>4</sub> | 1,7 | 16.3                | 15.7    | $1.9 \times 10^{-1}$               | 4.4                   | -                                    | -                     | 6.4                  |
| D-shift                                      |     |                     |         |                                    |                       |                                      |                       |                      |
| C <sub>6</sub> H <sub>9</sub> O <sub>4</sub> | CO  | 14.2                |         | $2.2 \times 10^3$                  | -                     | $5.1 \times 10^2$                    | -                     | -                    |
| loss                                         |     |                     |         |                                    |                       |                                      |                       |                      |
| C <sub>6</sub> H <sub>9</sub> O <sub>6</sub> | 1,8 | 18.0                | 24.2    | $6.5 \times 10^{-2}$               | $2.4 \times 10^{-7}$  | $1.5 \times 10^{-2}$                 | $3.8 \times 10^{-8}$  | 33                   |
| H-shift                                      |     |                     |         |                                    |                       |                                      |                       |                      |
| C <sub>6</sub> D <sub>9</sub> O <sub>6</sub> | 1,8 | 18.7                | 25.2    | $1.6 \times 10^{-2}$               | $3.8 \times 10^{-8}$  | -                                    | -                     | 5.1                  |
| D-shift                                      |     |                     |         |                                    |                       |                                      |                       |                      |
| C <sub>6</sub> H <sub>9</sub> O <sub>6</sub> | 1,7 | 16.7                | 29.8    | $3.7 \times 10^{-1}$               | $2.3 \times 10^{-11}$ | $9.7 \times 10^{-2}$                 | $4.0 \times 10^{-11}$ | 39                   |
| H-shift                                      |     |                     |         |                                    |                       |                                      |                       |                      |
| C <sub>6</sub> H <sub>9</sub> O <sub>6</sub> | CO  | 9.5                 |         | $2.4 \times 10^5$                  | -                     | $3.3 \times 10^6$                    | -                     | -                    |
| loss                                         |     |                     |         |                                    |                       |                                      |                       |                      |
| C <sub>6</sub> H <sub>9</sub> O <sub>8</sub> | 1,7 | 19.9                | 22.8    | $1.2 \times 10^{-3}$               | $7.1 \times 10^{-6}$  | $6.2 \times 10^{-5}$                 | $5.2 \times 10^{-7}$  | 723                  |
| H-shift                                      |     |                     |         |                                    |                       |                                      |                       |                      |
| C <sub>6</sub> D <sub>9</sub> O <sub>8</sub> | 1,7 | 21.0                | 23.8    | $1.5 \times 10^{-4}$               | $1.1 \times 10^{-6}$  | -                                    | -                     | 22                   |
| D-shift                                      |     |                     |         |                                    |                       |                                      |                       |                      |
| C <sub>6</sub> H <sub>9</sub> O <sub>8</sub> | 1,4 | 22.4                | -       | $6.5 \times 10^{-5}$               | -                     | $1.1 \times 10^{-4}$                 | -                     | $\approx 10^b$       |
| H-shift                                      |     |                     |         |                                    |                       |                                      |                       |                      |
| C <sub>6</sub> H <sub>9</sub> O <sub>8</sub> | 1,5 | 21.0                | -       | $7.6 \times 10^{-4}$               | -                     | $5.7 \times 10^{-5}$                 | -                     | -                    |
| H-shift                                      |     |                     |         |                                    |                       |                                      |                       |                      |
| C <sub>6</sub> H <sub>9</sub> O <sub>8</sub> | 1,6 | 19.8                | 18.4    | $4.2 \times 10^{-3}$               | $2.2 \times 10^{-1}$  | $5.2 \times 10^{-4}$                 | $7.1 \times 10^{-3}$  | 200                  |
| H-shift                                      |     |                     |         |                                    |                       |                                      |                       |                      |

396 <sup>a</sup>Note that rates do not include tunneling corrections. <sup>b</sup>The exact Eckart tunneling factor could not be  
 397 completed due to the lack of data on the reverse barrier; test calculations varying the reverse barrier in a wide  
 398 range between 10 and 50 kcal/mol indicate that the tunneling factor is very likely between 8 and 12.

399

400

### 401 **S2.3.1 Assessing the effect of hindered rotors: uncoupled models**

402

403 We evaluated the effect of hindered rotations on the rate coefficients using the hindered rotor module of the  
404 Gaussian 09 program suite<sup>77-80</sup>. Specifically, we ran a hindered rotor frequency calculation for all the  
405 reactants, transition states and products with the lowest zero-point corrected energy. However, for many of  
406 these structures, the program was unable to find a one-to-one correspondence between vibrational and  
407 internal rotation modes, and thus did not calculate hindered rotor-corrected partition functions, energies,  
408 entropies or other thermodynamic parameters. Closer inspection revealed that the problem occurred for all  
409 transition states, and also for some (though not all) of the reactants and products containing internal  
410 hydrogen bonds, which may partially constrain the internal rotations.

411

412 In order to qualitatively assess the effect of hindered rotations on the reaction energetics, we did the  
413 following. For the reactants and products for which the hindered rotor module worked on the lowest-energy  
414 conformer (specifically, the  $C_6H_9O_4$  reactant and product and the  $C_6H_9O_6$  product), we used the values from  
415 those calculations. For the  $C_6H_9O_6$  reactant and the  $C_6H_9O_8$  1,7 H-shift reactant and product (for which the  
416 hindered rotor module failed), we constructed a new set of conformers, where the six carbon atoms were  
417 arranged linearly (i.e., the carbon chain did not loop back on itself), and the OOH groups were oriented so  
418 that no ring structures with hydrogen bonds could form. These conformers were naturally higher in energy  
419 than the respective minimum-energy conformers, and were only used for assessing the effect of internal  
420 rotations. For these systems, the hindered rotor module was able to calculate the desired corrections to  
421 thermodynamic parameters. Altogether, this resulted in a set of 49 identified hindered rotation modes (from  
422 the six studied molecules), for which average thermodynamic parameters could then be calculated.

423

424 The main effect of hindered rotations on the thermodynamic parameters is to increase the entropy, and  
425 thereby decrease the free energy. Hindered rotations also have a small effect on the thermal energy  
426 (including zero-point energy corrections), but this is not systematic – the energy can both increase and  
427 decrease. According to the results of the hindered rotor module, each hindered rotation increases the entropy  
428 by between about 0.06 and 0.46 cal/K mol, with an average value of 0.28 cal/K mol, and changes the thermal  
429 energy by between -0.05 and +0.064 kcal/mol, with an average value of +0.033 kcal/mol. These together  
430 change the Gibbs free energy (at 298.15 K) by -0.05 kcal/mol per torsional mode. These values correspond  
431 to the McClurg treatments; the model by Pitzer & Gwinn yields essentially identical results while that by  
432 Truhlar consistently predicts smaller effects. We used these average values to qualitatively assess the effect  
433 of hindered rotations on the rate coefficients. It should be noted that the Gaussian program also reports an  
434 entropic effect from the so-called "multiplicity" of the hindered rotations, i.e., the fact that some internal  
435 rotations connect multiple accessible minima. This effect is already accounted for via the conformational  
436 sampling in the MC-TST rate coefficients (see section S2.2.), and is therefore not included in this calculation.



437 Since the products of hydrogen shift reactions have one more torsional angle than the reactants (due to the  
438 new OOH group), accounting for hindered rotations thus slightly increases the thermodynamic favorability  
439 of the hydrogen shift reactions (an entropy difference of 0.28 cal/K mol corresponds to an increase in the  
440 equilibrium constant of about 15 percent at 298 K). The increase in thermal energy acts in the opposite  
441 direction, but the magnitude of this effect is less than half of the entropic effect; about 6 percent. Compared  
442 to the other error sources in our calculations, the hindered rotor effect on the equilibrium constants is thus  
443 negligible.

444

445 Due to the constraints imposed by the reacting C-H...O-O groups, the hydrogen shift transition states have a  
446 smaller number of internal rotation degrees of freedom than the reactants and products. The net effect of the  
447 internal rotations is thus to lower both the forward and reverse rate coefficients. The magnitude of this effect  
448 depends on both the number of internal rotations in the reactants/products, and on the number of rotations  
449 constrained by the transition state. For the 1,7 H-shift transition state of  $C_6H_9O_4$ , and the 1,8 H-shift  
450 transition state of  $C_6H_9O_6$ , all but one of the internal rotations are constrained (see Figs S5 and S6). As  
451 discussed above, the combined entropic and energetic effects imply that one hindered rotation mode present  
452 in the reactant but not the transition state decreases the forward rate coefficient by approximately a factor of  
453 1.09. Thus, the 1,7 H-shift of  $C_6H_9O_4$  and the 1,8 H-shift of  $C_6H_9O_6$  are slowed down by factors of about 1.5  
454 and 1.7, respectively. The 1,7 H-shift transition state of  $C_6H_9O_6$  (leading to OH loss) has one more internal  
455 rotation degree of freedom compared to the competing 1,8 H-shift transition state. This implies that the  
456 relative rate coefficient of the 1,7 H-shift will be further increased by a factor of 1.09 due to internal rotor  
457 effects. This does not change the qualitative conclusion that the branching ratios of the 1,7 and 1,8 H-shift  
458 channels are roughly 90% and 10%, respectively.

459

460 For the H-shift transition states of  $C_6H_9O_8$ , the number of internal rotations is 8, 7, 6 and 5 for the 1,4, 1,5,  
461 1,6 and 1,7 H-shifts, respectively, compared to 10 for the reactant. This corresponds to decreases in the  
462 forward rate coefficient ranging from a factor of 1.2 (for the 1,4 H-shift) to 1.5 (for the 1,8 H-shift). The  
463 change in relative rates does not change the conclusion that the 1,6 and 1,7 H-shifts form the main channels  
464 for the  $C_6H_9O_8$  radical.

465

466 The CO loss transition states have an equal number of internal rotations compared to their reactants, and the  
467 internal rotation corrections therefore largely cancel out.

468

### 469 **S2.3.2 Assessing the effect of hindered rotors: MS-T modeling**

470

471 Since many of the torsional modes of our molecules are likely strongly coupled to each other, the 1-  
472 dimensional torsional anharmonicity treatment implemented in the Gaussian Hindered Rotor module is likely

insufficient to fully model the effect of hindered rotations on the hydrogen shift reactions. Therefore, we performed further calculations using the MS-Tor program<sup>80, 81</sup>, which is based on the multistructural approximation with torsional anharmonicity (MS-T)<sup>102, 103</sup>. The MS-Tor program is not designed to accept input structures with more than 7 torsional angles, preventing its direct application to our second hydrogen shift step C<sub>6</sub>H<sub>9</sub>O<sub>6</sub> (where the reactant has 8 torsional angles).

We treated the first hydrogen shift step (step 1a in Scheme 2) following the MS-Tor manual. We obtained a value of +1.1 kcal/mol for the effect of torsional anharmonicity on the free energy difference between the transition state and reactant at 298.15 K, calculated as the difference between the MS-LH (“multistructural local harmonic”) and MS-T free energy values given by the MS-Tor program. This net effect was composed of enthalpy and entropy changes for both the transition state and the reactant. For the C<sub>6</sub>H<sub>9</sub>O<sub>4</sub> reactant, including all six torsions, going from MS-LH to MS-T increased the enthalpy (H) by 0.15 kcal/mol, and decreased the entropy contribution to the free energy (-TS) by -0.03 kcal/mol. In comparison, the simple uncoupled averaged approach described in section 2.3.1 predicted an enthalpy increase of 0.18 kcal/mol and a decrease in the entropy contribution of -0.48 kcal/mol, assuming six torsions in the reactant. For the transition state with one torsion, MS-Tor predicted an enthalpy decrease of -0.45 kcal/mol, and an increase in the entropy contribution (-TS) of +1.64 kcal/mol. It is surprising that the effect predicted for the transition state is so much larger than that for the reactant, as the former has only one (non-constrained) torsional degree of freedom, while the latter has six – one of which corresponds to exactly the same rotating group as in the transition state (the terminal CHO group). Closer inspection of the MS-Tor output indicates that its treatment of the transition states may be problematic for our system. For several conformers of the C<sub>6</sub>H<sub>9</sub>O<sub>4</sub> transition state, MS-Tor reported effective torsional barriers of less than 0.01 kcal/mol. In the corresponding reactant structures, the lowest torsional barriers were always above 1 kcal/mol, and usually at least 2 kcal/mol, even for the same rotating group (i.e. the terminal CHO group). Thus, while the MS-T model is considerably more advanced than the uncoupled model used in Gaussian’s Hindered Rotor package, even the MS-Tor results must be considered qualitative for this particular system.

By modifying the program code, we were able to run MS-Tor also for C<sub>6</sub>H<sub>9</sub>O<sub>6</sub>, but not C<sub>6</sub>H<sub>9</sub>O<sub>8</sub> (which has 10 torsional angles in the reactant). Treating the C<sub>6</sub>H<sub>9</sub>O<sub>6</sub> reactant required first modifying the program code to accept eight torsional modes as input, running MS-Tor to identify the effective torsional barriers, and then removing one of the torsions as its barrier was too high, leading to non-numerical (“NaN”) output values for the MS-T thermodynamic parameters. After these modifications, we finally obtained a value of +0.5 kcal/mol for the effect of torsional anharmonicity on the free energy barrier of the 1,8 H-shift of C<sub>6</sub>H<sub>9</sub>O<sub>6</sub> (reaction 3a in Scheme 2). Closer inspection of the output revealed that the C<sub>6</sub>H<sub>9</sub>O<sub>6</sub> transition state (with 2 torsions) also had very low (< 0.01 kcal/mol) effective torsional barriers for many conformers.

509 The MS-Tor results indicate that torsional anharmonicity slows down the first H-shift step by a factor of 6,  
510 and the second by a factor of 2. The effect is thus somewhat larger than predicted by the 1-dimensional  
511 treatment in the Gaussian 09 program, but still fairly small compared to e.g. tunneling.

512

#### 513 S2.4. Molecular structures and thermodynamic parameters of the studied system

514 Figures S5, S6 and S7 show the lowest-energy structures (at the ROHF-RCCSD(T)-F12a/VDZ-  
515 F12// $\omega$ B97XD/aug-cc-pVTZ level including zero-point energy corrections) for the  $C_6H_9O_4$ ,  $C_6H_9O_6$  and  
516  $C_6H_9O_8$  systems, respectively. The corresponding thermodynamic parameters are given in Table S4, and the  
517 cartesian co-ordinates in Table S5.

518

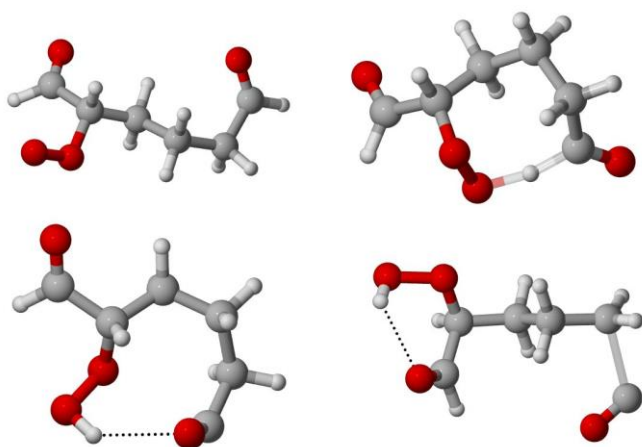

519

520

521 **Figure S5** Lowest-energy structures for  $C_6H_9O_4$ . Top left: reactant. Top right: 1,7 H-shift transition state.  
522 Bottom left: product. Bottom right: CO loss transition state. Color coding: gray=carbon, red=oxygen,  
523 white=hydrogen.

524

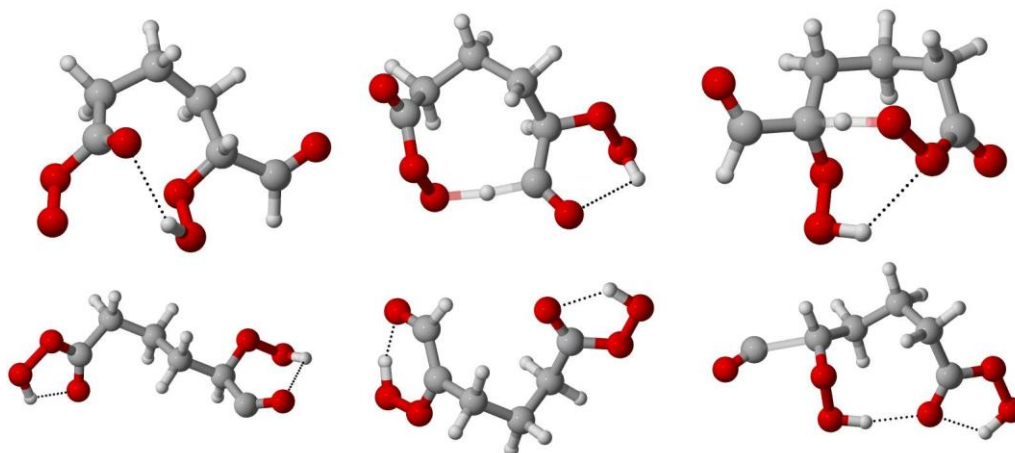

525

526 **Figure S6** Lowest-energy structures for  $C_6H_9O_6$ . Top left: reactant. Top middle: 1,8 H-shift transition state.  
527 Top right: 1,7 H-shift transition state. Bottom left: 1,8 H-shift product. Bottom middle: 1,7 H-shift product.  
528 Bottom right: CO loss transition state. Color coding as in Figure S5.

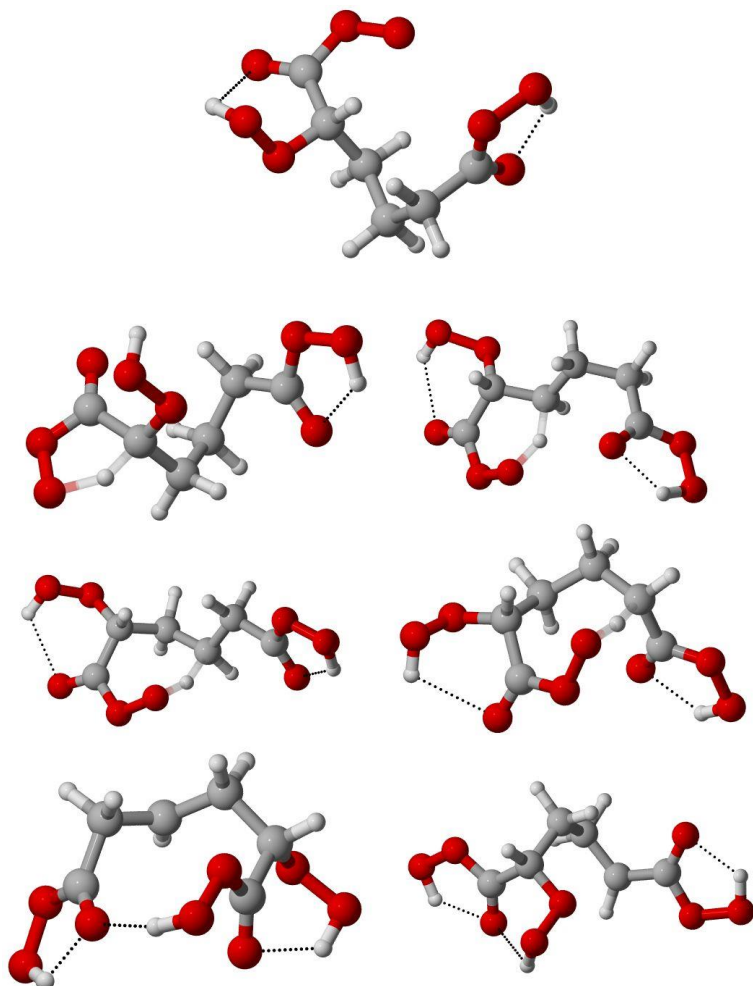

530  
531  
532 **Figure S7** Lowest-energy structures for  $C_6H_9O_8$ . Top row: reactant. Second row left: 1,4 H-shift transition  
533 state. Second row right: 1,5 H-shift transition state. Third row left: 1,6 H-shift transition state. Third row  
534 right: 1,7 H-shift transition state. Fourth row left: 1,6 H-shift product. Fourth row right: 1,7 H-shift product.  
535 Color coding as in Figure S5.

536  
537  
538  
539  
540  
541  
542

543 **Table S4** Energies, zero-point vibrational energies, thermal enthalpy and thermal free energy contributions  
544 of the structures shown in Figures S5-S7, and wavenumbers of the imaginary vibrational modes of the  
545 transition states.

| name                                                                     | E <sub>elec</sub> , DFT <sup>a, b</sup> | E <sub>elec</sub> , F12 <sup>a, c</sup> | ZPE,<br>DFT <sup>d</sup> | H <sub>therm</sub> <sup>e</sup> | G <sub>therm</sub> <sup>f</sup> | Imag.<br>mode <sup>g</sup> |
|--------------------------------------------------------------------------|-----------------------------------------|-----------------------------------------|--------------------------|---------------------------------|---------------------------------|----------------------------|
| O <sub>2</sub>                                                           | -150.33429845                           | -150.17736641                           | 0.003881                 | 0.007188                        | -0.016069                       | -                          |
| C <sub>6</sub> H <sub>5</sub> O <sub>4</sub> reactant                    | -534.824880717                          | -534.15339617                           | 0.147996                 | 0.160132                        | 0.108268                        | -                          |
| C <sub>6</sub> H <sub>5</sub> O <sub>4</sub> 1,7 TS <sup>h</sup>         | -534.798589759                          | -534.12466692                           | 0.144093                 | 0.154920                        | 0.107580                        | 1647.5i                    |
| C <sub>6</sub> H <sub>5</sub> O <sub>4</sub> 1,7<br>product <sup>i</sup> | -534.818448473                          | -534.15265521                           | 0.148700                 | 0.160676                        | 0.110943                        | -                          |
| C <sub>6</sub> H <sub>5</sub> O <sub>4</sub> CO loss<br>TS               | -534.788765728                          | -534.12543581                           | 0.144180                 | 0.156836                        | 0.104288                        | 324.7i                     |
| C <sub>6</sub> H <sub>5</sub> O <sub>6</sub> reactant                    | -685.210047983                          | -684.39158629                           | 0.157809                 | 0.171450                        | 0.117191                        | -                          |
| C <sub>6</sub> H <sub>5</sub> O <sub>6</sub> 1,8 TS                      | -685.184014815                          | -684.35868956                           | 0.153573                 | 0.166247                        | 0.114695                        | 1522.6i                    |
| C <sub>6</sub> H <sub>5</sub> O <sub>6</sub> 1,7 TS                      | -685.183123412                          | -684.36021210                           | 0.153053                 | 0.165806                        | 0.114568                        | 1552.1i                    |
| C <sub>6</sub> H <sub>5</sub> O <sub>6</sub> 1,7 product                 | -685.235734867                          | -684.41402811                           | 0.159310                 | 0.172617                        | 0.117435                        | -                          |
| C <sub>6</sub> H <sub>5</sub> O <sub>6</sub> 1,8<br>product              | -685.216831503                          | -684.40194656                           | 0.158345                 | 0.172347                        | 0.115741                        | -                          |
| C <sub>6</sub> H <sub>5</sub> O <sub>6</sub> CO loss<br>TS               | -685.199920390                          | -684.38435707                           | 0.155923                 | 0.169908                        | 0.114266                        | 304.0i                     |
| C <sub>6</sub> H <sub>5</sub> O <sub>8</sub> reactant                    | -835.603426981                          | -834.63563540                           | 0.167668                 | 0.183337                        | 0.122589                        | -                          |
| C <sub>6</sub> H <sub>5</sub> O <sub>8</sub> 1,4 TS                      | -835.566677026                          | -834.59460527                           | 0.162282                 | 0.177683                        | 0.118478                        | 1303.2i                    |
| C <sub>6</sub> H <sub>5</sub> O <sub>8</sub> 1,5 TS                      | -835.563800893                          | -834.59600828                           | 0.161437                 | 0.176412                        | 0.117553                        | 1827.8i                    |
| C <sub>6</sub> H <sub>5</sub> O <sub>8</sub> 1,6 TS                      | -835.566270440                          | -834.59777991                           | 0.161327                 | 0.176304                        | 0.117723                        | 1812.8i                    |
| C <sub>6</sub> H <sub>5</sub> O <sub>8</sub> 1,7 TS                      | -835.567518408                          | -834.59802378                           | 0.161699                 | 0.176439                        | 0.119177                        | 1938.3i                    |
| C <sub>6</sub> H <sub>5</sub> O <sub>8</sub> 1,6<br>product              | -835.596984075                          | -834.63227092                           | 0.166466                 | 0.182142                        | 0.122948                        | -                          |
| C <sub>6</sub> H <sub>5</sub> O <sub>8</sub> 1,7<br>product              | -835.605611663                          | -834.63944183                           | 0.166804                 | 0.182701                        | 0.121594                        | -                          |

546 <sup>a</sup>Energies (with <sup>b</sup>DFT referring to ωB97XD/aug-cc-pVTZ, and <sup>c</sup>F12 referring to ROHF-RCCSD(T)-  
547 F12a/VDZ-F12), <sup>d</sup>zero-point vibrational energies, <sup>e</sup>thermal enthalpy, and, <sup>f</sup>thermal free energy contributions  
548 of the structures shown in Figures S5-S7, given in Hartree, at 298.15 K and 1 atm reference pressure.  
549 <sup>g</sup>Wavenumbers given in cm<sup>-1</sup>. <sup>h</sup>”1,X TS”, and, <sup>i</sup>”1,X product” refer to transition states and products of 1,X  
550 hydrogen shifts, respectively.

551 **Table S5** Cartesian co-ordinates (in Ångström) of the structures shown in Figures S5-S7 and given in Table  
552 S4.

553

554 O<sub>2</sub> (triplet)

555 O 0.0 0.0 0.597986

556 O 0.0 0.0 -0.597986

557

558

559 C<sub>6</sub>H<sub>9</sub>O<sub>4</sub> reactant

560 C -2.5739518 1.2524534 -0.3228367

561 H -3.6006238 0.9247124 -0.5697497

562 C -1.6652128 0.1555354 0.2187893

563 H -1.6606948 0.2329174 1.3091033

564 C -0.2614618 0.2005084 -0.3444957

565 H 0.1040662 1.2156884 -0.1933407

566 H -0.3076148 0.0310974 -1.4234897

567 C 0.6764472 -0.8084966 0.3115523

568 H 0.2965712 -1.8184886 0.1574583

569 H 0.6971102 -0.6322566 1.3886893

570 C 2.0947262 -0.7237726 -0.2310237

571 H 2.1121462 -0.7492086 -1.3257187

572 C 2.8675442 0.4906404 0.2082923

573 H 3.8753802 0.5895794 -0.2414767

574 O 2.4728512 1.3066254 0.9957223

575 O -2.2141578 2.3846354 -0.4574207

576 H 2.6886052 -1.5893366 0.0809223

577 O -2.2489098 -1.1263556 -0.1103237

578 O -3.3528198 -1.3364786 0.5493473

579

580 C<sub>6</sub>H<sub>9</sub>O<sub>4</sub> 1,7 H-shift TS

581 C -2.3773989 -0.7902039 -1.0177839

582 H -2.6907109 -1.8130539 -0.7390539

583 C -1.3961369 -0.1451449 -0.0471519

584 H -1.9676989 0.5522031 0.5746321

585 C -0.2873569 0.5993891 -0.7800459

586 H -0.7824159 1.3044401 -1.4474039

587 H 0.2406201 -0.1028799 -1.4270559

588 C 0.7003831 1.3600241 0.1047081

589 H 0.1726571 2.1296741 0.6705001

|     |                                                                  |            |            |            |
|-----|------------------------------------------------------------------|------------|------------|------------|
| 590 | H                                                                | 1.3987881  | 1.8791831  | -0.5523109 |
| 591 | C                                                                | 1.5151351  | 0.5191751  | 1.1054181  |
| 592 | H                                                                | 0.8912851  | 0.2430691  | 1.9552321  |
| 593 | C                                                                | 2.0033581  | -0.7707879 | 0.4904741  |
| 594 | H                                                                | 1.0118101  | -1.5571679 | 0.3096961  |
| 595 | O                                                                | 3.1044801  | -1.0784389 | 0.1935241  |
| 596 | O                                                                | -2.7993019 | -0.2350519 | -1.9916789 |
| 597 | H                                                                | 2.3799451  | 1.0767491  | 1.4631011  |
| 598 | O                                                                | -0.9455549 | -1.1141029 | 0.8899301  |
| 599 | O                                                                | -0.1718869 | -2.0570739 | 0.2452691  |
| 600 |                                                                  |            |            |            |
| 601 | C <sub>6</sub> H <sub>9</sub> O <sub>4</sub> 1,7 H-shift product |            |            |            |
| 602 | C                                                                | -2.5784244 | 0.2565130  | 0.1240697  |
| 603 | H                                                                | -3.1698764 | -0.4060090 | -0.5345123 |
| 604 | C                                                                | -1.0899994 | -0.0541120 | 0.1742527  |
| 605 | H                                                                | -0.8518874 | -0.3965120 | 1.1870457  |
| 606 | C                                                                | -0.2390604 | 1.1617490  | -0.1670713 |
| 607 | H                                                                | -0.6916984 | 2.0119660  | 0.3433227  |
| 608 | H                                                                | -0.3194754 | 1.3550800  | -1.2400773 |
| 609 | C                                                                | 1.2282116  | 1.0595690  | 0.2436927  |
| 610 | H                                                                | 1.2981346  | 0.8841590  | 1.3187707  |
| 611 | H                                                                | 1.6947416  | 2.0274080  | 0.0545367  |
| 612 | C                                                                | 2.0509366  | 0.0004770  | -0.4973253 |
| 613 | H                                                                | 3.1209376  | 0.2111940  | -0.4150883 |
| 614 | C                                                                | 1.9171126  | -1.4140380 | 0.0033577  |
| 615 | O                                                                | 1.4509686  | -1.8199680 | 1.0090997  |
| 616 | O                                                                | -3.0797654 | 1.1526360  | 0.7428147  |
| 617 | H                                                                | 1.8307156  | -0.0137070 | -1.5650393 |
| 618 | O                                                                | -0.7714094 | -1.0735800 | -0.7573373 |
| 619 | O                                                                | -1.2813454 | -2.3012370 | -0.2570243 |
| 620 | H                                                                | -0.5188164 | -2.6415880 | 0.2325117  |
| 621 |                                                                  |            |            |            |
| 622 | C <sub>6</sub> H <sub>9</sub> O <sub>4</sub> CO loss TS          |            |            |            |
| 623 | C                                                                | 3.3979236  | -0.4450339 | 0.0378843  |
| 624 | C                                                                | 2.0723866  | 1.2382751  | 0.6191043  |
| 625 | C                                                                | 0.6970506  | 0.6697771  | 0.6567573  |
| 626 | C                                                                | 0.1165606  | 0.4200131  | -0.7337137 |
| 627 | C                                                                | -1.2695084 | -0.2174029 | -0.7162177 |
| 628 | O                                                                | -2.1355014 | 0.6643301  | -0.0500537 |

|     |                                                             |            |            |            |
|-----|-------------------------------------------------------------|------------|------------|------------|
| 629 | O                                                           | -3.4639884 | 0.1775541  | -0.1835207 |
| 630 | O                                                           | 2.8714046  | -1.4548809 | 0.0637853  |
| 631 | C                                                           | -1.2276194 | -1.5851669 | -0.0649657 |
| 632 | O                                                           | -1.8987054 | -1.9056589 | 0.8780203  |
| 633 | H                                                           | 2.5715236  | 1.4310421  | 1.5597833  |
| 634 | H                                                           | 2.3356446  | 1.9153041  | -0.1840567 |
| 635 | H                                                           | 0.0397076  | 1.3551121  | 1.2029723  |
| 636 | H                                                           | 0.6973436  | -0.2556359 | 1.2411583  |
| 637 | H                                                           | 0.0502396  | 1.3588601  | -1.2845037 |
| 638 | H                                                           | -0.5208974 | -2.2988409 | -0.5325137 |
| 639 | H                                                           | -1.6109984 | -0.3690839 | -1.7490187 |
| 640 | H                                                           | 0.7775966  | -0.2367469 | -1.3026027 |
| 641 | H                                                           | -3.5001634 | -0.4618169 | 0.5417023  |
| 642 |                                                             |            |            |            |
| 643 | C <sub>6</sub> H <sub>9</sub> O <sub>6</sub> reactant       |            |            |            |
| 644 | C                                                           | 1.9470966  | 0.0508505  | -0.1259375 |
| 645 | C                                                           | 1.3627836  | 1.2933705  | 0.4671175  |
| 646 | H                                                           | 2.1170236  | 2.0738415  | 0.3328765  |
| 647 | H                                                           | 1.2531706  | 1.1468665  | 1.5412505  |
| 648 | C                                                           | 0.0468236  | 1.7188865  | -0.1816425 |
| 649 | H                                                           | 0.1595626  | 1.7066495  | -1.2667835 |
| 650 | H                                                           | -0.1388684 | 2.7547175  | 0.1020835  |
| 651 | C                                                           | -1.1757174 | 0.8946795  | 0.2200265  |
| 652 | H                                                           | -2.0684364 | 1.3595895  | -0.1980795 |
| 653 | H                                                           | -0.8493114 | -0.5818065 | -1.3148265 |
| 654 | H                                                           | -1.2953324 | 0.8974955  | 1.3066635  |
| 655 | O                                                           | 2.7679796  | -0.5819635 | 0.8538225  |
| 656 | O                                                           | 3.2635586  | -1.7209535 | 0.4541375  |
| 657 | O                                                           | 1.8447866  | -0.3813875 | -1.2241115 |
| 658 | C                                                           | -1.1711084 | -0.5479985 | -0.2686385 |
| 659 | C                                                           | -2.5495904 | -1.1858305 | -0.1817335 |
| 660 | H                                                           | -2.5867984 | -2.1407595 | 0.3737795  |
| 661 | O                                                           | -3.5267554 | -0.6939785 | -0.6715915 |
| 662 | O                                                           | -0.2481574 | -1.2707975 | 0.5308475  |
| 663 | O                                                           | 0.0265556  | -2.5038275 | -0.1178515 |
| 664 | H                                                           | 0.8207356  | -2.2876435 | -0.6314095 |
| 665 |                                                             |            |            |            |
| 666 | C <sub>6</sub> H <sub>9</sub> O <sub>6</sub> 1,8 H-shift TS |            |            |            |
| 667 | C                                                           | 0.3029300  | -1.9228668 | 1.5033120  |



|     |                                                             |            |            |            |
|-----|-------------------------------------------------------------|------------|------------|------------|
| 668 | C                                                           | 0.6197360  | -0.4806288 | 1.8021020  |
| 669 | H                                                           | 1.1602690  | -0.4770898 | 2.7468930  |
| 670 | H                                                           | -0.2839420 | 0.1076102  | 1.9233060  |
| 671 | C                                                           | 1.5310230  | 0.0935392  | 0.7078080  |
| 672 | H                                                           | 2.4623950  | -0.4722628 | 0.7025270  |
| 673 | H                                                           | 1.7805020  | 1.1221112  | 0.9728780  |
| 674 | C                                                           | 0.9482560  | 0.0622702  | -0.7028850 |
| 675 | H                                                           | 0.7399050  | -0.9659388 | -1.0051630 |
| 676 | H                                                           | -0.4870130 | 1.5659532  | -0.0179630 |
| 677 | H                                                           | 1.6932740  | 0.4371382  | -1.4039630 |
| 678 | O                                                           | -0.9607660 | -2.2574218 | 1.0615970  |
| 679 | O                                                           | -1.8839030 | -1.2384688 | 1.0884110  |
| 680 | O                                                           | 1.0908310  | -2.8163638 | 1.5569540  |
| 681 | C                                                           | -0.2964750 | 0.9431582  | -0.8993300 |
| 682 | C                                                           | -1.5461970 | 0.0824082  | -1.0841820 |
| 683 | H                                                           | -1.7719870 | -0.6170858 | -0.0664240 |
| 684 | O                                                           | -2.2552720 | 0.0457672  | -2.0266420 |
| 685 | O                                                           | -0.0584330 | 1.7543452  | -2.0172440 |
| 686 | O                                                           | -1.0961710 | 2.7192752  | -2.0980370 |
| 687 | H                                                           | -1.6889630 | 2.3145512  | -2.7439550 |
| 688 |                                                             |            |            |            |
| 689 | C <sub>6</sub> H <sub>9</sub> O <sub>6</sub> 1,7 H-shift TS |            |            |            |
| 690 | C                                                           | 2.0131868  | -0.8014105 | 0.1744345  |
| 691 | C                                                           | 1.8865258  | 0.6985615  | 0.1334465  |
| 692 | H                                                           | 2.8698248  | 1.0459595  | -0.1753055 |
| 693 | H                                                           | 1.6625248  | 1.1014465  | 1.1176435  |
| 694 | C                                                           | 0.8539018  | 1.1758355  | -0.9062905 |
| 695 | H                                                           | 0.9588938  | 0.5770205  | -1.8108295 |
| 696 | H                                                           | 1.1187538  | 2.1963495  | -1.1810015 |
| 697 | C                                                           | -0.6078412 | 1.2016525  | -0.4564385 |
| 698 | H                                                           | -1.2214972 | 1.5695875  | -1.2823025 |
| 699 | H                                                           | -0.5608162 | -0.3998955 | 1.0632655  |
| 700 | H                                                           | -0.7473792 | 1.9034615  | 0.3662315  |
| 701 | O                                                           | 1.2117588  | -1.5151605 | 1.0594145  |
| 702 | O                                                           | 0.4157748  | -0.7412415 | 1.8666085  |
| 703 | O                                                           | 2.7218818  | -1.4591615 | -0.5186535 |
| 704 | C                                                           | -1.1716612 | -0.1206165 | 0.0121805  |
| 705 | C                                                           | -2.6076942 | -0.0971775 | 0.4761365  |
| 706 | H                                                           | -3.1915142 | -1.0034035 | 0.2513845  |

|     |                                                                  |            |            |            |
|-----|------------------------------------------------------------------|------------|------------|------------|
| 707 | O                                                                | -3.0704232 | 0.8415495  | 1.0620305  |
| 708 | O                                                                | -0.8542712 | -1.1136315 | -0.8922255 |
| 709 | O                                                                | -1.2554412 | -2.3752795 | -0.3746405 |
| 710 | H                                                                | -0.4244882 | -2.6844455 | 0.0149105  |
| 711 |                                                                  |            |            |            |
| 712 | C <sub>6</sub> H <sub>9</sub> O <sub>6</sub> 1,8 H-shift product |            |            |            |
| 713 | C                                                                | 2.5253058  | 0.0093651  | 0.0902010  |
| 714 | C                                                                | 1.6017688  | 1.0204331  | -0.5292320 |
| 715 | H                                                                | 1.5793088  | 0.8685911  | -1.6083130 |
| 716 | H                                                                | 2.0595508  | 1.9973591  | -0.3592900 |
| 717 | C                                                                | 0.2036718  | 0.9852941  | 0.0758440  |
| 718 | H                                                                | -0.3614522 | 1.8317881  | -0.3107990 |
| 719 | H                                                                | 0.2777198  | 1.1116121  | 1.1568320  |
| 720 | C                                                                | -0.5346422 | -0.3124099 | -0.2349490 |
| 721 | H                                                                | 0.0100728  | -1.1663899 | 0.1694000  |
| 722 | H                                                                | -1.8968802 | -0.1655229 | 1.4438290  |
| 723 | H                                                                | -0.6112472 | -0.4570669 | -1.3153720 |
| 724 | O                                                                | 3.4710718  | -0.3788079 | -0.7765960 |
| 725 | O                                                                | 2.4820378  | -0.4161049 | 1.2171180  |
| 726 | C                                                                | -1.9321222 | -0.3416159 | 0.3638060  |
| 727 | C                                                                | -2.5692962 | -1.7290939 | 0.1902730  |
| 728 | O                                                                | -3.6182852 | -1.9697209 | -0.2797370 |
| 729 | O                                                                | -2.6863542 | 0.6647421  | -0.2671430 |
| 730 | O                                                                | -3.8929312 | 0.8478861  | 0.4544730  |
| 731 | H                                                                | -4.4930542 | 0.2513031  | -0.0114950 |
| 732 | O                                                                | 4.3799268  | -1.2852129 | -0.1846640 |
| 733 | H                                                                | 4.0058308  | -1.3664279 | 0.7158150  |
| 734 |                                                                  |            |            |            |
| 735 | C <sub>6</sub> H <sub>9</sub> O <sub>6</sub> 1,7 H-shift product |            |            |            |
| 736 | C                                                                | 2.0191544  | -0.1677872 | 0.2272037  |
| 737 | C                                                                | 1.0182214  | 0.8195978  | 0.7473687  |
| 738 | C                                                                | 0.1757724  | 1.4377188  | -0.3771003 |
| 739 | C                                                                | -0.7279436 | 0.4445138  | -1.1217363 |
| 740 | C                                                                | -1.7183686 | -0.2312052 | -0.2341993 |
| 741 | C                                                                | -1.6677066 | -1.6014842 | 0.0968797  |
| 742 | O                                                                | -2.4919726 | -2.1690082 | 0.8426877  |
| 743 | O                                                                | -2.6344566 | 0.6116118  | 0.2182587  |
| 744 | O                                                                | -3.5903726 | 0.1047258  | 1.1303047  |
| 745 | H                                                                | -3.3667176 | -0.8683382 | 1.1763817  |

|     |                                                         |            |            |            |
|-----|---------------------------------------------------------|------------|------------|------------|
| 746 | O                                                       | 1.7869464  | -1.2482132 | -0.2597033 |
| 747 | O                                                       | 3.2696614  | 0.2985798  | 0.3384557  |
| 748 | O                                                       | 4.2157464  | -0.6132072 | -0.1801043 |
| 749 | H                                                       | 3.6354614  | -1.3501822 | -0.4590353 |
| 750 | H                                                       | 0.3761814  | 0.2860718  | 1.4497957  |
| 751 | H                                                       | 1.5380394  | 1.6042988  | 1.2922407  |
| 752 | H                                                       | 0.8319124  | 1.9230048  | -1.1004723 |
| 753 | H                                                       | -1.2646026 | 0.9842058  | -1.9040583 |
| 754 | H                                                       | -0.1293486 | -0.3258112 | -1.6044183 |
| 755 | H                                                       | -0.4411646 | 2.2196428  | 0.0644377  |
| 756 | H                                                       | -0.8344436 | -2.1587352 | -0.3431873 |
| 757 |                                                         |            |            |            |
| 758 | C <sub>6</sub> H <sub>5</sub> O <sub>6</sub> CO loss TS |            |            |            |
| 759 | C                                                       | 1.9043726  | -0.3534020 | 0.3125963  |
| 760 | C                                                       | 1.1390106  | 0.8238700  | 0.8292883  |
| 761 | C                                                       | 0.2553026  | 1.4606000  | -0.2574917 |
| 762 | C                                                       | -0.8789574 | 0.5788890  | -0.7961907 |
| 763 | C                                                       | -1.8835334 | 0.1834530  | 0.2398823  |
| 764 | O                                                       | 1.5151036  | -1.4992360 | 0.2283033  |
| 765 | O                                                       | 3.1234916  | -0.0086850 | -0.1008337 |
| 766 | O                                                       | 3.8350766  | -1.1014810 | -0.6430097 |
| 767 | H                                                       | 3.1927496  | -1.8292610 | -0.5266617 |
| 768 | H                                                       | 1.8446556  | 1.5642180  | 1.2012323  |
| 769 | H                                                       | 0.5291626  | 0.4710210  | 1.6595343  |
| 770 | H                                                       | 0.8869726  | 1.7774950  | -1.0893217 |
| 771 | H                                                       | -0.1715844 | 2.3686690  | 0.1711553  |
| 772 | H                                                       | -1.4107644 | 1.1374380  | -1.5668177 |
| 773 | H                                                       | -0.4874574 | -0.3143470 | -1.2827417 |
| 774 | O                                                       | -1.6143484 | -0.8255920 | 1.1114723  |
| 775 | O                                                       | -1.2339624 | -2.0066450 | 0.4075313  |
| 776 | H                                                       | -0.2616794 | -1.9538540 | 0.4427233  |
| 777 | H                                                       | -2.3541944 | 0.9800090  | 0.8102983  |
| 778 | C                                                       | -3.5980034 | -0.4038130 | -0.8700027 |
| 779 | O                                                       | -4.3314124 | -1.0493460 | -0.2809457 |
| 780 |                                                         |            |            |            |
| 781 | C <sub>6</sub> H <sub>9</sub> O <sub>8</sub> reactant   |            |            |            |
| 782 | C                                                       | 2.2594118  | -0.0145370 | 0.0666580  |
| 783 | C                                                       | 1.4461558  | 1.2475740  | 0.1009180  |
| 784 | H                                                       | 2.1540308  | 2.0750150  | 0.0248150  |

|     |                                                             |            |            |            |
|-----|-------------------------------------------------------------|------------|------------|------------|
| 785 | H                                                           | 0.9593508  | 1.3413330  | 1.0704130  |
| 786 | C                                                           | 0.4471818  | 1.3274980  | -1.0516570 |
| 787 | H                                                           | 0.9922588  | 1.3546450  | -1.9944930 |
| 788 | H                                                           | -0.0952322 | 2.2668940  | -0.9618140 |
| 789 | C                                                           | -0.5384212 | 0.1611090  | -1.1170730 |
| 790 | H                                                           | -0.0077502 | -0.7595370 | -1.3566300 |
| 791 | H                                                           | -0.6393722 | -0.2855240 | 1.0128600  |
| 792 | H                                                           | -1.2549472 | 0.3417480  | -1.9192550 |
| 793 | O                                                           | 2.4464358  | -0.5068940 | 1.2990920  |
| 794 | O                                                           | 2.7135338  | -0.5538700 | -0.9107980 |
| 795 | C                                                           | -1.3114452 | -0.0593060 | 0.1835730  |
| 796 | O                                                           | -2.0154562 | 1.1280980  | 0.4381170  |
| 797 | O                                                           | -2.6080892 | 1.0286570  | 1.7251460  |
| 798 | H                                                           | -3.5142062 | 0.7844000  | 1.4983830  |
| 799 | O                                                           | 3.2414768  | -1.6745610 | 1.2785800  |
| 800 | H                                                           | 3.3919778  | -1.7833810 | 0.3178210  |
| 801 | C                                                           | -2.3058812 | -1.2009870 | 0.0400200  |
| 802 | O                                                           | -3.4770402 | -1.1100180 | -0.0957450 |
| 803 | O                                                           | -1.7873752 | -2.5206350 | 0.0717060  |
| 804 | O                                                           | -0.4965982 | -2.5877200 | 0.2793640  |
| 805 |                                                             |            |            |            |
| 806 | C <sub>6</sub> H <sub>9</sub> O <sub>8</sub> 1,4 H-shift TS |            |            |            |
| 807 | C                                                           | 2.2229443  | 0.0621679  | 0.1368969  |
| 808 | C                                                           | 1.1788303  | 0.8331299  | 0.8901669  |
| 809 | H                                                           | 1.7139323  | 1.5291999  | 1.5398479  |
| 810 | H                                                           | 0.6345003  | 0.1580649  | 1.5479599  |
| 811 | C                                                           | 0.2357393  | 1.6159089  | -0.0174481 |
| 812 | H                                                           | 0.8032413  | 2.3639269  | -0.5701081 |
| 813 | H                                                           | -0.4644907 | 2.1531809  | 0.6220209  |
| 814 | C                                                           | -0.5405217 | 0.7882089  | -1.0509631 |
| 815 | H                                                           | 0.1402683  | 0.3967549  | -1.8070861 |
| 816 | H                                                           | -2.2752417 | -0.6208561 | -1.2524661 |
| 817 | H                                                           | -1.2491527 | 1.4398419  | -1.5613801 |
| 818 | O                                                           | 2.6793963  | -0.9671381 | 0.8636739  |
| 819 | O                                                           | 2.6489053  | 0.3015359  | -0.9653931 |
| 820 | C                                                           | -1.3181117 | -0.3869271 | -0.4993741 |
| 821 | O                                                           | -0.4789247 | -1.4423081 | -0.3009891 |
| 822 | O                                                           | -1.2203477 | -2.5316441 | 0.2306229  |
| 823 | H                                                           | -0.8409527 | -2.6051231 | 1.1153349  |

|     |                                                             |            |            |            |
|-----|-------------------------------------------------------------|------------|------------|------------|
| 824 | O                                                           | 3.6999203  | -1.6718151 | 0.1855989  |
| 825 | H                                                           | 3.7417233  | -1.1777481 | -0.6578631 |
| 826 | C                                                           | -2.2576677 | -0.0831431 | 0.6724549  |
| 827 | O                                                           | -1.9659747 | 0.0271949  | 1.8207259  |
| 828 | O                                                           | -3.5082567 | 0.0789939  | 0.2066979  |
| 829 | O                                                           | -3.5797587 | -0.2614061 | -1.1489311 |
| 830 |                                                             |            |            |            |
| 831 | C <sub>6</sub> H <sub>9</sub> O <sub>8</sub> 1,5 H-shift TS |            |            |            |
| 832 | C                                                           | 2.6181002  | -0.0029391 | -0.0911303 |
| 833 | C                                                           | 1.7954332  | 1.1613369  | -0.5702213 |
| 834 | H                                                           | 1.7151682  | 1.1216099  | -1.6564103 |
| 835 | H                                                           | 2.3615902  | 2.0638029  | -0.3323753 |
| 836 | C                                                           | 0.4274272  | 1.2130119  | 0.0957777  |
| 837 | H                                                           | -0.0645938 | 2.1495729  | -0.1843103 |
| 838 | H                                                           | 0.5410352  | 1.2305089  | 1.1807557  |
| 839 | C                                                           | -0.4819778 | 0.0855729  | -0.3002423 |
| 840 | H                                                           | -0.0965998 | -1.0149641 | 0.2788097  |
| 841 | H                                                           | -1.8082688 | 0.3652889  | 1.3623787  |
| 842 | H                                                           | -0.4799628 | -0.1663471 | -1.3611393 |
| 843 | O                                                           | 3.5666512  | -0.3234471 | -0.9785613 |
| 844 | O                                                           | 2.4906382  | -0.5899721 | 0.9529467  |
| 845 | C                                                           | -1.8637828 | 0.0902669  | 0.3043507  |
| 846 | O                                                           | -2.6476278 | 1.0184469  | -0.4009733 |
| 847 | O                                                           | -3.8538068 | 1.2281309  | 0.3205777  |
| 848 | H                                                           | -4.3798578 | 0.4684889  | 0.0299207  |
| 849 | O                                                           | 4.3802592  | -1.3813391 | -0.5134983 |
| 850 | H                                                           | 3.9560972  | -1.5869331 | 0.3437837  |
| 851 | C                                                           | -2.4876618 | -1.3048131 | 0.2029737  |
| 852 | O                                                           | -3.6049458 | -1.5293341 | -0.1506433 |
| 853 | O                                                           | -1.6562348 | -2.3433871 | 0.4671037  |
| 854 | O                                                           | -0.4270798 | -1.9525621 | 1.0001257  |
| 855 |                                                             |            |            |            |
| 856 |                                                             |            |            |            |
| 857 | C <sub>6</sub> H <sub>9</sub> O <sub>8</sub> 1,6 H-shift TS |            |            |            |
| 858 | C                                                           | 2.7943931  | 0.0018830  | -0.0136164 |
| 859 | C                                                           | 1.4653341  | 0.7000340  | -0.1171904 |
| 860 | H                                                           | 1.6488631  | 1.6504470  | -0.6314544 |
| 861 | H                                                           | 1.1078271  | 0.9557010  | 0.8805046  |
| 862 | C                                                           | 0.4538141  | -0.1014540 | -0.8928544 |

|     |                                                             |            |            |            |
|-----|-------------------------------------------------------------|------------|------------|------------|
| 863 | H                                                           | 0.2279941  | -1.1330140 | -0.1304144 |
| 864 | H                                                           | 0.8548851  | -0.5558350 | -1.7942994 |
| 865 | C                                                           | -0.9150359 | 0.5200870  | -1.0342924 |
| 866 | H                                                           | -1.4302169 | 0.1195800  | -1.9058964 |
| 867 | H                                                           | -1.2565399 | 0.5083180  | 1.1278156  |
| 868 | H                                                           | -0.8239949 | 1.5993550  | -1.1822484 |
| 869 | O                                                           | 3.4723761  | 0.4255940  | 1.0579736  |
| 870 | O                                                           | 3.2375291  | -0.8129830 | -0.7798064 |
| 871 | C                                                           | -1.8098089 | 0.3280830  | 0.2039726  |
| 872 | O                                                           | -2.8428389 | 1.2647700  | 0.0645986  |
| 873 | O                                                           | -3.6451699 | 1.2214790  | 1.2341606  |
| 874 | H                                                           | -4.2900429 | 0.5422700  | 0.9916706  |
| 875 | O                                                           | 4.7491641  | -0.1734010 | 1.1385276  |
| 876 | H                                                           | 4.7316291  | -0.7711120 | 0.3647496  |
| 877 | C                                                           | -2.3955289 | -1.0832030 | 0.2203536  |
| 878 | O                                                           | -3.5456889 | -1.3401040 | 0.0378976  |
| 879 | O                                                           | -1.5241239 | -2.1237290 | 0.3578496  |
| 880 | O                                                           | -0.2648189 | -1.7427650 | 0.8019986  |
| 881 |                                                             |            |            |            |
| 882 | C <sub>6</sub> H <sub>9</sub> O <sub>8</sub> 1,7 H-shift TS |            |            |            |
| 883 | C                                                           | -2.1953498 | -0.1106593 | 0.2309493  |
| 884 | C                                                           | -1.4212908 | 0.6173677  | -0.7988567 |
| 885 | H                                                           | -2.0398918 | 0.9435487  | -1.6308067 |
| 886 | H                                                           | -0.7541168 | -0.3427623 | -1.3804327 |
| 887 | C                                                           | -0.3768318 | 1.6089707  | -0.3537997 |
| 888 | H                                                           | -0.8905138 | 2.4177787  | 0.1750533  |
| 889 | H                                                           | 0.0562102  | 2.0570667  | -1.2492117 |
| 890 | C                                                           | 0.7450292  | 1.1080057  | 0.5583603  |
| 891 | H                                                           | 0.3389242  | 0.6981467  | 1.4800483  |
| 892 | H                                                           | 1.8838312  | 0.2947107  | -1.1262047 |
| 893 | H                                                           | 1.3494502  | 1.9725887  | 0.8325333  |
| 894 | O                                                           | -3.2961738 | -0.6576623 | -0.3073587 |
| 895 | O                                                           | -1.9165308 | -0.2462323 | 1.3974933  |
| 896 | C                                                           | 1.7364882  | 0.1110997  | -0.0616347 |
| 897 | O                                                           | 2.9388382  | 0.3359097  | 0.6346923  |
| 898 | O                                                           | 3.9423482  | -0.4978373 | 0.0759453  |
| 899 | H                                                           | 3.9157702  | -1.2528923 | 0.6780153  |
| 900 | O                                                           | -4.0283578 | -1.3929723 | 0.6462493  |
| 901 | H                                                           | -3.4737638 | -1.2825303 | 1.4447453  |

|     |                                                                  |            |            |            |
|-----|------------------------------------------------------------------|------------|------------|------------|
| 902 | C                                                                | 1.3130452  | -1.3406363 | 0.1656473  |
| 903 | O                                                                | 1.7099572  | -2.0339453 | 1.0462393  |
| 904 | O                                                                | 0.3803032  | -1.8956523 | -0.6833277 |
| 905 | O                                                                | 0.0826252  | -1.1114123 | -1.7743397 |
| 906 |                                                                  |            |            |            |
| 907 |                                                                  |            |            |            |
| 908 | C <sub>6</sub> H <sub>9</sub> O <sub>8</sub> 1,6 H-shift product |            |            |            |
| 909 | C                                                                | 2.1774067  | 0.0521158  | -0.0875762 |
| 910 | O                                                                | 2.0428057  | 1.2551418  | -0.1078452 |
| 911 | C                                                                | 1.5051287  | -0.9245942 | 0.8449968  |
| 912 | C                                                                | 0.2462917  | -1.4598292 | 0.2417038  |
| 913 | C                                                                | -1.0853983 | -1.2968392 | 0.8832188  |
| 914 | C                                                                | -1.9906533 | -0.2632582 | 0.1869308  |
| 915 | C                                                                | -1.2461583 | 1.0514998  | -0.0506842 |
| 916 | O                                                                | -1.0670673 | 1.5616218  | -1.1154962 |
| 917 | O                                                                | -2.3656693 | -0.8278272 | -1.0402522 |
| 918 | O                                                                | -3.3424443 | 0.0081038  | -1.6427152 |
| 919 | H                                                                | -2.7799643 | 0.6672488  | -2.0749742 |
| 920 | O                                                                | 2.9598757  | -0.5756022 | -0.9618662 |
| 921 | O                                                                | 3.5439637  | 0.3094698  | -1.8946612 |
| 922 | H                                                                | 3.1700407  | 1.1671968  | -1.6128432 |
| 923 | O                                                                | -0.7884573 | 1.5124948  | 1.1295118  |
| 924 | O                                                                | -0.0740083 | 2.7253978  | 1.0052018  |
| 925 | H                                                                | 0.7595957  | 2.4072728  | 0.6099578  |
| 926 | H                                                                | -2.8753163 | -0.0660822 | 0.7986538  |
| 927 | H                                                                | -1.6356133 | -2.2403642 | 0.8648708  |
| 928 | H                                                                | -0.9785293 | -0.9943592 | 1.9243578  |
| 929 | H                                                                | 0.3096277  | -1.9416502 | -0.7241242 |
| 930 | H                                                                | 2.2127337  | -1.7337582 | 1.0507388  |
| 931 | H                                                                | 1.3018087  | -0.3933992 | 1.7728948  |
| 932 |                                                                  |            |            |            |
| 933 | C <sub>6</sub> H <sub>9</sub> O <sub>8</sub> 1,7 H-shift product |            |            |            |
| 934 | C                                                                | 2.5881395  | 0.0546671  | -0.1178608 |
| 935 | O                                                                | 3.0338975  | 0.0338101  | 1.0141972  |
| 936 | C                                                                | 1.3505195  | 0.6466001  | -0.5422348 |
| 937 | C                                                                | 0.4594515  | 1.2875541  | 0.4550862  |
| 938 | C                                                                | -0.2928635 | 0.2850191  | 1.3527482  |
| 939 | C                                                                | -1.2114975 | -0.6827999 | 0.6098272  |
| 940 | C                                                                | -2.1301325 | 0.0544861  | -0.3550298 |

|     |   |            |            |            |
|-----|---|------------|------------|------------|
| 941 | O | -2.0417845 | 0.0661201  | -1.5565128 |
| 942 | O | -0.3942845 | -1.5758419 | -0.0987858 |
| 943 | O | -1.2202545 | -2.5809949 | -0.6685518 |
| 944 | H | -1.3477845 | -2.2381099 | -1.5623588 |
| 945 | O | 3.2560075  | -0.5085039 | -1.1488278 |
| 946 | O | 4.4675045  | -1.0800789 | -0.7125508 |
| 947 | H | 4.4323565  | -0.8838909 | 0.2467342  |
| 948 | O | -3.0689705 | 0.7347441  | 0.3042962  |
| 949 | O | -3.9033875 | 1.4660791  | -0.5719028 |
| 950 | H | -3.5399705 | 1.2109651  | -1.4429538 |
| 951 | H | -1.8297135 | -1.2298639 | 1.3256082  |
| 952 | H | 0.4226265  | -0.3107039 | 1.9178722  |
| 953 | H | -0.8991025 | 0.8415021  | 2.0665672  |
| 954 | H | 1.0574635  | 1.9144931  | 1.1192982  |
| 955 | H | -0.2533315 | 1.9360441  | -0.0552578 |
| 956 | H | 1.0651105  | 0.5587041  | -1.5794078 |

957

958

959

960

961

962

963

964

965

966

967

968

969

970

971

972

973

974

975

976

977

978

979

980

981

982

983

984

985

986

987



| Conformer number | Vibrational partition function | Rotational partition function | Electronic energy incl. ZPVE in Hartrees | Relative energy in kcal/mol |
|------------------|--------------------------------|-------------------------------|------------------------------------------|-----------------------------|
| M001             | 1.67E+04                       | 1.00E+06                      | -534.674067                              | 1.77                        |
| M011             | 2.08E+04                       | 9.94E+05                      | -534.674906                              | 1.24                        |
| M015             | 1.58E+04                       | 1.07E+06                      | -534.673752                              | 1.97                        |
| M020             | 1.76E+04                       | 1.03E+06                      | -534.674682                              | 1.38                        |
| M035             | 1.69E+04                       | 1.10E+06                      | -534.674908                              | 1.24                        |
| M036             | 1.43E+04                       | 1.10E+06                      | -534.674559                              | 1.46                        |
| M037             | 1.04E+04                       | 1.02E+06                      | -534.674988                              | 1.19                        |
| M048             | 1.15E+04                       | 1.02E+06                      | -534.674565                              | 1.46                        |
| M050             | 9.89E+03                       | 1.04E+06                      | -534.676653                              | 0.15                        |
| M054             | 2.44E+04                       | 1.06E+06                      | -534.674911                              | 1.24                        |
| M070             | 2.15E+04                       | 1.17E+06                      | -534.674918                              | 1.23                        |
| M083             | 7.79E+03                       | 9.84E+05                      | -534.675994                              | 0.56                        |
| M092             | 1.85E+04                       | 1.00E+06                      | -534.674807                              | 1.30                        |
| M095             | 9.16E+03                       | 9.09E+05                      | -534.67587                               | 0.64                        |
| M111             | 1.37E+04                       | 9.96E+05                      | -534.676885                              | 0                           |
| M117             | 2.07E+04                       | 1.09E+06                      | -534.674329                              | 1.60                        |
| M119             | 1.53E+04                       | 1.10E+06                      | -534.674383                              | 1.57                        |
| M123             | 8.68E+03                       | 9.58E+05                      | -534.674717                              | 1.36                        |
| M124             | 9.58E+03                       | 9.51E+05                      | -534.676824                              | 0.04                        |
| M125             | 7.79E+03                       | 9.62E+05                      | -534.675482                              | 0.88                        |
| M129             | 8.37E+03                       | 9.57E+05                      | -534.674357                              | 1.59                        |
| M143             | 1.12E+04                       | 9.91E+05                      | -534.674639                              | 1.41                        |
| M150             | 1.37E+04                       | 1.04E+06                      | -534.675077                              | 1.13                        |
| M157             | 1.79E+04                       | 9.51E+05                      | -534.674872                              | 1.26                        |
| M162             | 2.22E+04                       | 1.09E+06                      | -534.673387                              | 2.20                        |
| M183             | 2.66E+04                       | 1.06E+06                      | -534.67401                               | 1.80                        |
| M188             | 6.63E+03                       | 9.04E+05                      | -534.674828                              | 1.29                        |
| M194             | 1.04E+04                       | 1.04E+06                      | -534.674861                              | 1.27                        |
| M212             | 5.31E+03                       | 8.49E+05                      | -534.675472                              | 0.89                        |
| M216             | 1.66E+04                       | 9.78E+05                      | -534.675398                              | 0.93                        |
| M226             | 1.30E+04                       | 9.06E+05                      | -534.675402                              | 0.93                        |
| M235             | 1.06E+04                       | 1.03E+06                      | -534.67606                               | 0.52                        |
| M248             | 7.55E+03                       | 9.19E+05                      | -534.67578                               | 0.69                        |
| M263             | 9.24E+03                       | 8.46E+05                      | -534.67582                               | 0.67                        |
| M286             | 1.20E+04                       | 9.91E+05                      | -534.675488                              | 0.88                        |
| M290             | 1.07E+04                       | 9.27E+05                      | -534.675767                              | 0.70                        |
| M292             | 3.33E+04                       | 8.89E+05                      | -534.675377                              | 0.95                        |
| M298             | 2.07E+04                       | 1.02E+06                      | -534.675785                              | 0.69                        |
| M322             | 8.30E+03                       | 9.41E+05                      | -534.676192                              | 0.43                        |
| M330             | 9.63E+03                       | 7.82E+05                      | -534.675413                              | 0.92                        |
| M337             | 2.18E+04                       | 1.06E+06                      | -534.675064                              | 1.14                        |

|      |          |          |             |      |
|------|----------|----------|-------------|------|
| M372 | 1.98E+04 | 1.17E+06 | -534.674754 | 1.34 |
| M373 | 1.39E+04 | 9.93E+05 | -534.675706 | 0.74 |
| M380 | 8.59E+03 | 9.02E+05 | -534.675244 | 1.03 |
| M387 | 1.07E+04 | 7.86E+05 | -534.675367 | 0.95 |
| M392 | 1.21E+04 | 8.25E+05 | -534.675354 | 0.96 |
| M402 | 3.16E+03 | 7.42E+05 | -534.676346 | 0.34 |
| M403 | 1.30E+04 | 1.11E+06 | -534.676659 | 0.14 |
| M440 | 6.73E+03 | 9.41E+05 | -534.67444  | 1.53 |
| M453 | 2.64E+03 | 7.30E+05 | -534.676777 | 0.07 |
| M456 | 9.27E+03 | 8.43E+05 | -534.674672 | 1.39 |
| M462 | 1.05E+04 | 9.89E+05 | -534.676516 | 0.23 |
| M496 | 1.55E+04 | 9.32E+05 | -534.674611 | 1.43 |
| M505 | 3.30E+04 | 1.07E+06 | -534.674139 | 1.72 |
| M506 | 5.03E+03 | 8.58E+05 | -534.675254 | 1.02 |
| M527 | 2.10E+03 | 6.90E+05 | -534.6762   | 0.43 |
| M542 | 2.20E+03 | 6.46E+05 | -534.67638  | 0.32 |
| M545 | 2.25E+04 | 9.23E+05 | -534.675854 | 0.65 |
| M548 | 2.43E+03 | 7.18E+05 | -534.676316 | 0.36 |

989  
990

991 **Table S7** Conformers of the transition state for the C<sub>6</sub>H<sub>9</sub>O<sub>4</sub> 1,7 H-shift.

| Conformer number | Vibrational partition function | Rotational partition function | Electronic energy incl. ZPVE in Hartees | Relative energy in kcal/mol |
|------------------|--------------------------------|-------------------------------|-----------------------------------------|-----------------------------|
| 107              | 1.21E+03                       | 7.52E+05                      | -534.651653                             | 1.78                        |
| 152              | 1.35E+03                       | 7.57E+05                      | -534.652989                             | 0.95                        |
| 172              | 1.15E+03                       | 7.10E+05                      | -534.652814                             | 1.06                        |
| 177              | 1.89E+03                       | 7.79E+05                      | -534.652732                             | 1.11                        |
| 19               | 5.77E+02                       | 7.05E+05                      | -534.652944                             | 0.97                        |
| 1                | 7.27E+02                       | 6.75E+05                      | -534.650137                             | 2.74                        |
| 249              | 2.09E+03                       | 7.68E+05                      | -534.647726                             | 4.25                        |
| 25               | 6.24E+02                       | 7.27E+05                      | -534.654497                             | 0                           |
| 274              | 6.65E+02                       | 6.68E+05                      | -534.647883                             | 4.15                        |
| 285              | 5.39E+02                       | 6.67E+05                      | -534.647666                             | 4.29                        |
| 4                | 5.35E+02                       | 7.10E+05                      | -534.648387                             | 3.83                        |
| 91               | 9.95E+02                       | 7.38E+05                      | -534.647938                             | 4.12                        |

992  
993

**Table S8** Conformers of the product for the C<sub>6</sub>H<sub>9</sub>O<sub>4</sub> 1,7 H-shift and also the reactant of C<sub>6</sub>H<sub>9</sub>O<sub>4</sub> CO loss.

| Conformer number | Vibrational partition function | Rotational partition function | Electronic energy incl. ZPVE in Hartrees | Relative energy in kcal/mol |
|------------------|--------------------------------|-------------------------------|------------------------------------------|-----------------------------|
| M001             | 1.44E+04                       | 9.97E+05                      | -534.667011                              | 1.72                        |
| M003             | 1.68E+04                       | 1.00E+06                      | -534.667312                              | 1.53                        |
| M009             | 1.45E+04                       | 9.29E+05                      | -534.667125                              | 1.65                        |
| M014             | 3.22E+04                       | 1.10E+06                      | -534.667077                              | 1.68                        |
| M019             | 3.25E+04                       | 1.10E+06                      | -534.667180                              | 1.61                        |
| M020             | 2.03E+04                       | 1.01E+06                      | -534.667204                              | 1.60                        |
| M025             | 2.27E+04                       | 1.04E+06                      | -534.667019                              | 1.71                        |
| M035             | 4.59E+04                       | 1.19E+06                      | -534.666702                              | 1.91                        |
| M043             | 2.40E+04                       | 1.11E+06                      | -534.666723                              | 1.90                        |
| M069             | 2.62E+04                       | 1.10E+06                      | -534.666741                              | 1.89                        |
| M086             | 2.63E+04                       | 1.10E+06                      | -534.666742                              | 1.89                        |
| M129             | 2.43E+04                       | 1.00E+06                      | -534.666986                              | 1.73                        |
| M133             | 2.25E+04                       | 1.04E+06                      | -534.666776                              | 1.86                        |
| M146             | 3.71E+04                       | 1.18E+06                      | -534.666672                              | 1.93                        |
| M147             | 2.11E+04                       | 1.08E+06                      | -534.666821                              | 1.84                        |
| M148             | 1.28E+04                       | 9.35E+05                      | -534.669259                              | 0.31                        |
| M167             | 1.25E+04                       | 9.48E+05                      | -534.668303                              | 0.91                        |
| M173             | 9.13E+03                       | 9.54E+05                      | -534.667595                              | 1.35                        |
| M181             | 8.65E+03                       | 1.02E+06                      | -534.668384                              | 0.86                        |
| M192             | 9.63E+03                       | 9.80E+05                      | -534.668818                              | 0.58                        |
| M209             | 5.43E+03                       | 7.60E+05                      | -534.668914                              | 0.52                        |
| M212             | 2.79E+04                       | 1.02E+06                      | -534.666695                              | 1.92                        |
| M227             | 3.19E+04                       | 9.99E+05                      | -534.666609                              | 1.97                        |
| M246             | 1.69E+04                       | 1.03E+06                      | -534.666429                              | 2.08                        |
| M265             | 5.81E+03                       | 7.86E+05                      | -534.668635                              | 0.70                        |
| M273             | 1.14E+04                       | 1.02E+06                      | -534.666622                              | 1.96                        |
| M314             | 1.52E+04                       | 1.03E+06                      | -534.666585                              | 1.98                        |
| M338             | 5.34E+03                       | 7.66E+05                      | -534.669026                              | 0.45                        |
| M346             | 2.25E+04                       | 1.04E+06                      | -534.666775                              | 1.87                        |
| M386             | 2.34E+03                       | 7.26E+05                      | -534.669748                              | 0                           |
| M390             | 2.73E+04                       | 1.05E+06                      | -534.666837                              | 1.83                        |
| M539             | 1.22E+04                       | 8.25E+05                      | -534.668904                              | 0.53                        |
| M547             | 1.14E+04                       | 1.01E+06                      | -534.669464                              | 0.18                        |
| M675             | 1.39E+04                       | 9.10E+05                      | -534.668110                              | 1.03                        |

997 **Table S9** Conformers of the transition state of C<sub>6</sub>H<sub>9</sub>O<sub>4</sub> CO loss.

| Conformer number | Vibrational partition function | Rotational partition function | Electronic energy incl. ZPVE in Hartees | Relative energy in kcal/mol |
|------------------|--------------------------------|-------------------------------|-----------------------------------------|-----------------------------|
| M01              | 2.35E+04                       | 8.17E+05                      | -534.643885                             | 0.44                        |
| M03              | 1.67E+04                       | 8.27E+05                      | -534.643456                             | 0.71                        |
| M09              | 1.04E+04                       | 8.40E+05                      | -534.642906                             | 1.05                        |
| M10              | 4.81E+04                       | 8.74E+05                      | -534.642020                             | 1.61                        |
| M12              | 2.42E+04                       | 8.01E+05                      | -534.642863                             | 1.08                        |
| M13-             | 1.35E+04                       | 9.23E+05                      | -534.644017                             | 0.36                        |
| M14              | 1.80E+04                       | 9.04E+05                      | -534.644586                             | 0                           |
| M17              | 1.35E+04                       | 9.23E+05                      | -534.644018                             | 0.36                        |
| M21              | 2.34E+04                       | 9.55E+05                      | -534.643479                             | 0.69                        |
| M25              | 3.24E+04                       | 1.01E+06                      | -534.644118                             | 0.29                        |
| M27              | 6.16E+04                       | 1.02E+06                      | -534.642474                             | 1.33                        |
| M28              | 2.17E+04                       | 9.82E+05                      | -534.644304                             | 0.18                        |
| M43              | 1.09E+04                       | 8.58E+05                      | -534.643170                             | 0.89                        |
| M44              | 1.35E+04                       | 8.80E+05                      | -534.642984                             | 1.01                        |
| M53-             | 7.25E+04                       | 9.79E+05                      | -534.642253                             | 1.46                        |
| M63              | 2.04E+05                       | 1.21E+06                      | -534.641669                             | 1.83                        |
| M67              | 4.55E+04                       | 1.10E+06                      | -534.643355                             | 0.77                        |
| M70              | 8.26E+04                       | 1.03E+06                      | -534.641673                             | 1.83                        |
| M74-             | 6.38E+04                       | 1.16E+06                      | -534.641783                             | 1.76                        |
| M75              | 1.18E+05                       | 1.14E+06                      | -534.640900                             | 2.31                        |

998  
999

1000 **Table S10** Conformers of the reactant for the C<sub>6</sub>H<sub>9</sub>O<sub>6</sub> 1,8 H-shift and 1,7 H-shift.

| Conformer number | Vibrational partition function | Rotational partition function | Electronic energy incl. ZPVE in Hartees | Relative energy in kcal/mol |
|------------------|--------------------------------|-------------------------------|-----------------------------------------|-----------------------------|
| M012             | 4.84E+04                       | 1.47E+06                      | -685.049415                             | 1.77                        |
| M032             | 2.61E+04                       | 1.26E+06                      | -685.051564                             | 0.42                        |
| M039             | 1.36E+04                       | 1.36E+06                      | -685.050459                             | 1.12                        |
| M043             | 1.19E+04                       | 1.36E+06                      | -685.051868                             | 0.23                        |
| M066             | 1.70E+04                       | 1.53E+06                      | -685.050893                             | 0.84                        |
| M071             | 1.84E+04                       | 1.52E+06                      | -685.052093                             | 0.09                        |
| M087             | 2.83E+04                       | 1.53E+06                      | -685.051497                             | 0.47                        |
| M121             | 7.95E+04                       | 1.78E+06                      | -685.05018                              | 1.29                        |
| M222             | 1.50E+05                       | 1.97E+06                      | -685.048624                             | 2.27                        |
| M227             | 6.77E+04                       | 1.93E+06                      | -685.049899                             | 1.47                        |
| M273             | 2.51E+04                       | 1.50E+06                      | -685.050332                             | 1.20                        |
| M329             | 7.31E+04                       | 1.61E+06                      | -685.0509                               | 0.84                        |
| M372             | 2.67E+05                       | 2.08E+06                      | -685.0485                               | 2.35                        |
| M385             | 5.68E+04                       | 1.77E+06                      | -685.050996                             | 0.78                        |
| M387             | 7.26E+04                       | 1.94E+06                      | -685.047824                             | 2.77                        |
| M528             | 1.73E+05                       | 1.85E+06                      | -685.048334                             | 2.45                        |
| M546             | 2.33E+05                       | 1.87E+06                      | -685.048301                             | 2.47                        |
| M572             | 2.12E+04                       | 1.23E+06                      | -685.052239                             | 0                           |
| M666             | 5.87E+04                       | 1.57E+06                      | -685.050473                             | 1.11                        |
| M703             | 1.04E+05                       | 1.84E+06                      | -685.048644                             | 2.26                        |
| M961             | 1.88E+05                       | 2.07E+06                      | -685.049039                             | 2.01                        |

1001  
1002

1003 **Table S11** Conformers of the transition state for the C<sub>6</sub>H<sub>9</sub>O<sub>6</sub> 1,8 H-shift.

| Conformer number | Vibrational partition function | Rotational partition function | Electronic energy incl. ZPVE in Hartees | Relative energy in kcal/mol |
|------------------|--------------------------------|-------------------------------|-----------------------------------------|-----------------------------|
| M114             | 3.12E+03                       | 1.23E+06                      | -685.028291                             | 1.35                        |
| M189             | 3.16E+03                       | 1.30E+06                      | -685.030442                             | 0                           |
| M220             | 2.46E+03                       | 1.20E+06                      | -685.028390                             | 1.29                        |
| M266             | 1.43E+03                       | 9.86E+05                      | -685.027391                             | 1.91                        |
| M341             | 1.76E+03                       | 1.01E+06                      | -685.028846                             | 1.00                        |
| M369             | 3.88E+03                       | 1.26E+06                      | -685.029924                             | 0.33                        |
| M400             | 3.02E+03                       | 1.29E+06                      | -685.028979                             | 0.92                        |
| M482             | 3.04E+03                       | 1.24E+06                      | -685.028666                             | 1.11                        |
| M693             | 1.88E+03                       | 1.18E+06                      | -685.027469                             | 1.87                        |

1004  
1005  
1006  
1007

**Table S12** Conformers of the transition state for the C<sub>6</sub>H<sub>9</sub>O<sub>6</sub> 1,7 H-shift.

| Conformer number | Vibrational partition function | Rotational partition function | Electronic energy incl. ZPVE in Hartees | Relative energy in kcal/mol |
|------------------|--------------------------------|-------------------------------|-----------------------------------------|-----------------------------|
| M031             | 2.50E+03                       | 1.09E+06                      | -685.030071                             | 0                           |
| M034             | 2.50E+03                       | 1.09E+06                      | -685.030070                             | 0.00                        |
| M061             | 2.75E+03                       | 1.18E+06                      | -685.029012                             | 0.66                        |
| M064             | 4.11E+03                       | 1.16E+06                      | -685.026928                             | 1.97                        |
| M076             | 4.97E+03                       | 1.20E+06                      | -685.025618                             | 2.79                        |
| M080             | 4.11E+03                       | 1.16E+06                      | -685.026929                             | 1.97                        |
| M151             | 3.36E+03                       | 1.13E+06                      | -685.027051                             | 1.90                        |

1008  
1009

**Table S13** Conformers of the product for the C<sub>6</sub>H<sub>9</sub>O<sub>6</sub> 1,8 H-shift and reactant for the C<sub>6</sub>H<sub>9</sub>O<sub>6</sub> CO loss.

| Conformer number | Vibrational partition function | Rotational partition function | Electronic energy incl. ZPVE in Hartrees | Relative energy in kcal/mol |
|------------------|--------------------------------|-------------------------------|------------------------------------------|-----------------------------|
| M004             | 1.97E+05                       | 1.72E+06                      | -685.056826                              | 1.04                        |
| M013             | 2.38E+05                       | 1.77E+06                      | -685.057240                              | 0.78                        |
| M017             | 1.18E+05                       | 1.54E+06                      | -685.058315                              | 0.11                        |
| M018             | 1.18E+05                       | 1.54E+06                      | -685.058316                              | 0.11                        |
| M020             | 1.18E+05                       | 1.82E+06                      | -685.058486                              | 0                           |
| M024             | 7.86E+05                       | 2.09E+06                      | -685.052147                              | 3.98                        |
| M027             | 1.42E+05                       | 1.83E+06                      | -685.057552                              | 0.59                        |
| M028             | 1.10E+05                       | 1.49E+06                      | -685.057268                              | 0.76                        |
| M041             | 3.12E+05                       | 1.78E+06                      | -685.055345                              | 1.97                        |
| M049             | 4.86E+05                       | 1.96E+06                      | -685.055532                              | 1.85                        |
| M051             | 2.43E+05                       | 1.91E+06                      | -685.057042                              | 0.91                        |
| M052             | 3.21E+05                       | 1.82E+06                      | -685.056130                              | 1.48                        |
| M059             | 1.20E+05                       | 1.69E+06                      | -685.055747                              | 1.72                        |
| M064             | 1.64E+05                       | 1.69E+06                      | -685.056849                              | 1.03                        |
| M075             | 1.49E+05                       | 1.72E+06                      | -685.056637                              | 1.16                        |
| M079             | 1.41E+05                       | 1.69E+06                      | -685.056786                              | 1.07                        |
| M100             | 1.74E+05                       | 1.94E+06                      | -685.048537                              | 6.24                        |
| M130             | 1.95E+05                       | 1.97E+06                      | -685.047048                              | 7.18                        |
| M132             | 2.20E+05                       | 2.09E+06                      | -685.048944                              | 5.99                        |
| M144             | 1.80E+05                       | 1.99E+06                      | -685.048677                              | 6.16                        |
| M161             | 1.47E+05                       | 1.74E+06                      | -685.048367                              | 6.35                        |
| M182             | 2.19E+04                       | 1.54E+06                      | -685.050543                              | 4.98                        |
| M187             | 1.90E+05                       | 2.00E+06                      | -685.046868                              | 7.29                        |
| M191             | 2.78E+04                       | 1.35E+06                      | -685.056543                              | 1.22                        |
| M205             | 1.38E+05                       | 1.82E+06                      | -685.049251                              | 5.80                        |
| M221             | 1.64E+05                       | 1.81E+06                      | -685.048094                              | 6.52                        |
| M223             | 1.40E+05                       | 1.79E+06                      | -685.048408                              | 6.32                        |
| M246             | 1.61E+05                       | 1.86E+06                      | -685.048799                              | 6.08                        |
| M263             | 1.83E+05                       | 1.87E+06                      | -685.049539                              | 5.61                        |
| M303             | 1.49E+05                       | 1.85E+06                      | -685.048705                              | 6.14                        |
| M388             | 1.88E+05                       | 1.64E+06                      | -685.049116                              | 5.88                        |
| M407             | 2.44E+05                       | 1.81E+06                      | -685.048620                              | 6.19                        |
| M413             | 2.85E+04                       | 1.30E+06                      | -685.057673                              | 0.51                        |
| M428             | 1.50E+05                       | 1.62E+06                      | -685.048623                              | 6.19                        |
| M454             | 1.41E+05                       | 1.65E+06                      | -685.048327                              | 6.37                        |
| M487             | 1.36E+05                       | 1.75E+06                      | -685.048356                              | 6.36                        |
| M503             | 1.29E+05                       | 1.85E+06                      | -685.048663                              | 6.16                        |
| M505             | 1.72E+04                       | 1.26E+06                      | -685.049405                              | 5.70                        |
| M507             | 1.92E+04                       | 1.27E+06                      | -685.049954                              | 5.35                        |
| M547             | 1.66E+04                       | 1.36E+06                      | -685.049022                              | 5.94                        |
| M550             | 9.70E+03                       | 1.21E+06                      | -685.049190                              | 5.83                        |



|      |          |          |             |      |
|------|----------|----------|-------------|------|
| M584 | 3.52E+04 | 1.23E+06 | -685.049417 | 5.69 |
| M618 | 1.66E+04 | 1.36E+06 | -685.049023 | 5.94 |
| M657 | 1.57E+04 | 1.21E+06 | -685.049757 | 5.48 |
| M004 | 5.73E+04 | 1.39E+06 | -685.056436 | 1.29 |
| M011 | 7.22E+04 | 1.36E+06 | -685.056814 | 1.05 |
| M021 | 1.50E+05 | 1.52E+06 | -685.055627 | 1.79 |
| M034 | 2.39E+04 | 1.77E+06 | -685.054497 | 2.50 |
| M035 | 2.67E+04 | 1.40E+06 | -685.056324 | 1.36 |
| M042 | 1.74E+05 | 1.87E+06 | -685.056164 | 1.46 |
| M055 | 1.95E+05 | 1.79E+06 | -685.055014 | 2.18 |
| M059 | 2.84E+05 | 1.81E+06 | -685.056181 | 1.45 |
| M064 | 2.71E+05 | 1.78E+06 | -685.055851 | 1.65 |
| M083 | 2.00E+05 | 1.68E+06 | -685.055878 | 1.64 |
| M096 | 2.40E+05 | 1.87E+06 | -685.056383 | 1.32 |
| M100 | 2.90E+05 | 1.87E+06 | -685.056614 | 1.17 |
| M109 | 1.70E+05 | 1.82E+06 | -685.058029 | 0.29 |
| M146 | 7.12E+04 | 1.52E+06 | -685.057848 | 0.40 |
| M161 | 3.62E+05 | 2.07E+06 | -685.057066 | 0.89 |
| M163 | 2.59E+05 | 2.07E+06 | -685.057312 | 0.74 |
| M174 | 2.45E+04 | 1.95E+06 | -685.057178 | 0.82 |
| M272 | 4.10E+05 | 1.73E+06 | -685.056722 | 1.11 |
| M303 | 2.21E+05 | 1.86E+06 | -685.058152 | 0.21 |
| M350 | 2.06E+05 | 1.82E+06 | -685.056596 | 1.19 |
| M420 | 1.93E+05 | 1.88E+06 | -685.057483 | 0.63 |
| M516 | 3.00E+05 | 1.90E+06 | -685.056702 | 1.12 |
| M598 | 8.96E+04 | 1.49E+06 | -685.057899 | 0.37 |
| M622 | 1.75E+05 | 1.55E+06 | -685.057870 | 0.39 |
| M748 | 2.25E+05 | 1.93E+06 | -685.055852 | 1.65 |
| M808 | 2.04E+05 | 1.78E+06 | -685.056119 | 1.49 |
| M856 | 2.03E+05 | 1.75E+06 | -685.055899 | 1.62 |
| M914 | 1.73E+05 | 1.83E+06 | -685.056491 | 1.25 |

1011  
1012

1013 **Table S14** Conformers of the product for the C<sub>6</sub>H<sub>9</sub>O<sub>6</sub> 1,7 H-shift.

| Conformer number | Vibrational partition function | Rotational partition function | Electronic energy incl. ZPVE in Hartrees | Relative energy in kcal/mol |
|------------------|--------------------------------|-------------------------------|------------------------------------------|-----------------------------|
| M006             | 2.82E+04                       | 1.22E+06                      | -685.071137                              | 3.32                        |
| M042             | 2.38E+03                       | 9.79E+05                      | -685.073271                              | 1.98                        |
| M044             | 6.60E+04                       | 1.49E+06                      | -685.076425                              | 0.00                        |
| M132             | 1.51E+05                       | 1.81E+06                      | -685.074789                              | 1.03                        |
| M059             | 1.61E+04                       | 1.03E+06                      | -685.072684                              | 2.35                        |
| M104             | 1.89E+04                       | 1.12E+06                      | -685.070558                              | 3.68                        |

1014  
1015  
1016

1017 **Table S15** Conformers of the transition state for the C<sub>6</sub>H<sub>9</sub>O<sub>6</sub> CO loss.

| Conformer number | Vibrational partition function | Rotational partition function | Electronic energy incl. ZPVE in Hartrees | Relative energy in kcal/mol |
|------------------|--------------------------------|-------------------------------|------------------------------------------|-----------------------------|
| M002             | 9.69E+04                       | 1.40E+06                      | -685.043171                              | 0.52                        |
| M003             | 1.80E+06                       | 2.01E+06                      | -685.040855                              | 1.97                        |
| M004             | 8.64E+05                       | 2.24E+06                      | -685.043070                              | 0.58                        |
| M005             | 6.26E+05                       | 2.09E+06                      | -685.042810                              | 0.74                        |
| M006             | 6.72E+04                       | 1.32E+06                      | -685.041896                              | 1.32                        |
| M008             | 6.91E+05                       | 2.07E+06                      | -685.042621                              | 0.86                        |
| M010             | 6.81E+05                       | 1.98E+06                      | -685.042989                              | 0.63                        |
| M013             | 7.20E+05                       | 2.24E+06                      | -685.042784                              | 0.76                        |
| M014             | 4.39E+05                       | 1.70E+06                      | -685.041682                              | 1.45                        |
| M005             | 5.31E+05                       | 1.92E+06                      | -685.042297                              | 1.07                        |
| M007             | 8.07E+05                       | 1.92E+06                      | -685.041468                              | 1.59                        |
| M009             | 5.92E+05                       | 1.69E+06                      | -685.041388                              | 1.64                        |
| M011             | 4.82E+05                       | 1.64E+06                      | -685.042254                              | 1.09                        |
| M012             | 8.98E+05                       | 1.79E+06                      | -685.040994                              | 1.88                        |
| M033             | 5.36E+04                       | 1.46E+06                      | -685.043997                              | 0                           |
| M034             | 7.38E+04                       | 1.50E+06                      | -685.043714                              | 0.18                        |
| M034             | 1.14E+05                       | 1.62E+06                      | -685.042345                              | 1.04                        |
| M040             | 4.29E+05                       | 1.71E+06                      | -685.042109                              | 1.18                        |
| M041             | 8.13E+05                       | 1.93E+06                      | -685.041837                              | 1.36                        |
| M049             | 3.89E+05                       | 1.96E+06                      | -685.043252                              | 0.47                        |
| M050             | 5.60E+05                       | 1.87E+06                      | -685.041634                              | 1.48                        |
| M075             | 7.49E+05                       | 1.90E+06                      | -685.042089                              | 1.20                        |
| M089             | 4.05E+05                       | 1.90E+06                      | -685.043021                              | 0.61                        |
| M095             | 6.70E+05                       | 2.05E+06                      | -685.042853                              | 0.72                        |
| M117             | 6.73E+05                       | 1.75E+06                      | -685.042985                              | 0.64                        |
| M142             | 5.97E+05                       | 1.90E+06                      | -685.042611                              | 0.87                        |
| M160             | 1.08E+06                       | 1.84E+06                      | -685.041696                              | 1.44                        |
| M161             | 5.98E+05                       | 1.90E+06                      | -685.042612                              | 0.87                        |
| M190             | 4.05E+05                       | 1.90E+06                      | -685.043020                              | 0.61                        |
| M211             | 1.08E+06                       | 1.84E+06                      | -685.041698                              | 1.44                        |
| M231             | 8.06E+05                       | 2.01E+06                      | -685.042063                              | 1.21                        |
| M246             | 4.02E+05                       | 1.71E+06                      | -685.043537                              | 0.29                        |
| M258             | 6.95E+05                       | 2.01E+06                      | -685.042522                              | 0.93                        |
| M259             | 5.00E+05                       | 2.03E+06                      | -685.042321                              | 1.05                        |
| M265             | 1.14E+06                       | 1.79E+06                      | -685.042959                              | 0.65                        |
| M298             | 6.26E+05                       | 1.67E+06                      | -685.042323                              | 1.05                        |
| M303             | 7.20E+05                       | 2.24E+06                      | -685.042784                              | 0.76                        |
| M328             | 5.98E+05                       | 1.68E+06                      | -685.041474                              | 1.58                        |
| M339             | 7.39E+05                       | 1.77E+06                      | -685.042011                              | 1.25                        |
| M340             | 1.79E+06                       | 2.04E+06                      | -685.041850                              | 1.35                        |
| M375             | 9.36E+05                       | 2.08E+06                      | -685.042573                              | 0.89                        |

|      |          |          |             |      |
|------|----------|----------|-------------|------|
| M386 | 3.84E+05 | 1.99E+06 | -685.042931 | 0.67 |
| M429 | 4.06E+05 | 1.74E+06 | -685.043041 | 0.60 |
| M433 | 5.91E+05 | 1.70E+06 | -685.042846 | 0.72 |
| M434 | 4.82E+05 | 2.01E+06 | -685.043485 | 0.32 |
| M460 | 6.60E+05 | 2.02E+06 | -685.043085 | 0.57 |
| M462 | 4.11E+05 | 1.67E+06 | -685.042585 | 0.89 |
| M487 | 1.24E+05 | 1.44E+06 | -685.042210 | 1.12 |
| M509 | 8.81E+05 | 1.94E+06 | -685.042302 | 1.06 |
| M538 | 6.69E+05 | 1.84E+06 | -685.042632 | 0.86 |
| M580 | 4.34E+05 | 2.01E+06 | -685.043748 | 0.16 |
| M581 | 6.29E+05 | 1.71E+06 | -685.043602 | 0.25 |
| M588 | 6.97E+05 | 1.72E+06 | -685.043358 | 0.40 |
| M613 | 8.63E+04 | 1.43E+06 | -685.043395 | 0.38 |
| M734 | 6.10E+05 | 1.97E+06 | -685.042873 | 0.71 |
| M790 | 4.10E+05 | 1.65E+06 | -685.043187 | 0.51 |

1018  
1019

**Table S16** Conformers of the reactant for the C<sub>6</sub>H<sub>9</sub>O<sub>8</sub> 1,7 H-shift, 1,4 H-shift, 1,5 H-shift and 1,6 H-shift.

| Conformer number | Vibrational partition function | Rotational partition function | Electronic energy incl. ZPVE in Hartrees | Relative energy in kcal/mol |
|------------------|--------------------------------|-------------------------------|------------------------------------------|-----------------------------|
| M017             | 5.09E+05                       | 2.15E+06                      | -835.435129                              | 0.40                        |
| M040             | 2.07E+06                       | 2.76E+06                      | -835.434371                              | 0.87                        |
| M062             | 1.37E+06                       | 2.55E+06                      | -835.435462                              | 0.19                        |
| M0020            | 3.24E+06                       | 2.91E+06                      | -835.433048                              | 1.70                        |
| M0026            | 4.62E+06                       | 2.92E+06                      | -835.431993                              | 2.36                        |
| M0042            | 4.71E+06                       | 2.96E+06                      | -835.432021                              | 2.35                        |
| M0056            | 4.85E+06                       | 3.17E+06                      | -835.431996                              | 2.36                        |
| M0110            | 6.48E+06                       | 3.17E+06                      | -835.432568                              | 2.00                        |
| M0186            | 3.18E+06                       | 2.75E+06                      | -835.432783                              | 1.87                        |
| M0201            | 5.64E+06                       | 3.17E+06                      | -835.432767                              | 1.88                        |
| M0253            | 4.98E+06                       | 2.89E+06                      | -835.432402                              | 2.11                        |
| M0274            | 3.57E+06                       | 2.99E+06                      | -835.432932                              | 1.77                        |
| M0294            | 4.21E+06                       | 3.02E+06                      | -835.432707                              | 1.92                        |
| M0299            | 2.95E+06                       | 3.02E+06                      | -835.433419                              | 1.47                        |
| M0370            | 3.15E+05                       | 2.43E+06                      | -835.435034                              | 0.45                        |
| M0459            | 3.30E+06                       | 2.89E+06                      | -835.433156                              | 1.63                        |
| M0466            | 4.82E+06                       | 3.03E+06                      | -835.432599                              | 1.98                        |
| M0712            | 2.78E+06                       | 2.69E+06                      | -835.43299                               | 1.74                        |
| M0776            | 2.69E+06                       | 2.74E+06                      | -835.432757                              | 1.88                        |
| M0844            | 4.76E+06                       | 2.83E+06                      | -835.432284                              | 2.18                        |
| M0859            | 3.46E+06                       | 3.18E+06                      | -835.432865                              | 1.82                        |
| M0896            | 2.13E+06                       | 2.83E+06                      | -835.434183                              | 0.99                        |
| M1022            | 3.20E+06                       | 2.41E+06                      | -835.432888                              | 1.80                        |
| M1084            | 6.70E+06                       | 2.81E+06                      | -835.431881                              | 2.43                        |
| M1094            | 2.07E+05                       | 2.32E+06                      | -835.434454                              | 0.82                        |
| M1114            | 2.34E+06                       | 3.08E+06                      | -835.435669                              | 0.06                        |
| M1123            | 6.21E+06                       | 2.49E+06                      | -835.433243                              | 1.58                        |
| M1245            | 3.64E+06                       | 3.22E+06                      | -835.4348                                | 0.60                        |
| M1254            | 1.83E+06                       | 3.21E+06                      | -835.434834                              | 0.58                        |
| M1262            | 2.78E+06                       | 2.98E+06                      | -835.433791                              | 1.23                        |
| M1338            | 1.42E+06                       | 3.00E+06                      | -835.434412                              | 0.85                        |
| M1339            | 3.10E+06                       | 3.01E+06                      | -835.434475                              | 0.81                        |
| M1362            | 1.91E+05                       | 2.02E+06                      | -835.434003                              | 1.10                        |
| M1789            | 2.43E+06                       | 2.75E+06                      | -835.43476                               | 0.63                        |
| M1791            | 1.79E+06                       | 2.80E+06                      | -835.435658                              | 0.06                        |
| M1930            | 3.09E+06                       | 2.89E+06                      | -835.435268                              | 0.31                        |
| M2327            | 1.05E+06                       | 2.18E+06                      | -835.435759                              | 0                           |
| M2419            | 7.52E+05                       | 2.60E+06                      | -835.43439                               | 0.86                        |
| M2525            | 2.02E+06                       | 2.89E+06                      | -835.434505                              | 0.79                        |
| M2533            | 4.33E+05                       | 2.14E+06                      | -835.43561                               | 0.09                        |
| M2960            | 9.16E+05                       | 2.30E+06                      | -835.43528                               | 0.30                        |

|       |          |          |             |      |
|-------|----------|----------|-------------|------|
| M3029 | 2.37E+06 | 2.84E+06 | -835.434129 | 1.02 |
| M3030 | 1.76E+06 | 2.86E+06 | -835.434169 | 1.00 |
| M3293 | 7.83E+04 | 1.94E+06 | -835.434566 | 0.75 |

1021  
1022  
1023

**Table S17** Conformers of the transition state for the C<sub>6</sub>H<sub>9</sub>O<sub>8</sub> 1,7 H-shift.

| Conformer number | Vibrational partition function | Rotational partition function | Electronic energy incl. ZPVE in Hartees | Relative energy in kcal/mol |
|------------------|--------------------------------|-------------------------------|-----------------------------------------|-----------------------------|
| M001             | 5.20E+04                       | 1.87E+06                      | -835.399864                             | 3.74                        |
| M002             | 4.16E+04                       | 1.85E+06                      | -835.398755                             | 4.43                        |
| M002             | 6.75E+04                       | 1.91E+06                      | -835.403292                             | 1.59                        |
| M014             | 7.76E+04                       | 1.96E+06                      | -835.405819                             | 0.00                        |
| M018             | 6.12E+04                       | 1.89E+06                      | -835.402376                             | 2.16                        |
| M022             | 5.06E+04                       | 1.95E+06                      | -835.404683                             | 0.71                        |

1024  
1025

**Table S18** Conformers of the transition state for the C<sub>6</sub>H<sub>9</sub>O<sub>8</sub> 1,6 H-shift.

| Conformer number | Vibrational partition function | Rotational partition function | Electronic energy incl. ZPVE in Hartees | Relative energy in kcal/mol |
|------------------|--------------------------------|-------------------------------|-----------------------------------------|-----------------------------|
| M001             | 4.34E+04                       | 2.09E+06                      | -835.395859                             | 5.70                        |
| M002             | 1.73E+05                       | 2.47E+06                      | -835.397249                             | 4.83                        |
| M004             | 4.13E+04                       | 1.87E+06                      | -835.396598                             | 5.24                        |
| M005             | 4.85E+04                       | 1.87E+06                      | -835.396372                             | 5.38                        |
| M015             | 1.34E+05                       | 2.54E+06                      | -835.404258                             | 0.43                        |
| M017             | 1.90E+05                       | 2.52E+06                      | -835.404943                             | 0.00                        |
| M024             | 1.75E+05                       | 2.42E+06                      | -835.402895                             | 1.29                        |
| M068             | 1.35E+05                       | 2.32E+06                      | -835.403966                             | 0.61                        |
| M071             | 2.36E+05                       | 2.59E+06                      | -835.404766                             | 0.11                        |
| M118             | 1.12E+05                       | 2.51E+06                      | -835.403913                             | 0.65                        |

1026  
1027  
1028  
1029

1030 **Table S19** Conformers of the transition state for the C<sub>6</sub>H<sub>9</sub>O<sub>8</sub> 1,5 H-shift.

| Conformer number | Vibrational partition function | Rotational partition function | Electronic energy incl. ZPVE in Hartees | Relative energy in kcal/mol |
|------------------|--------------------------------|-------------------------------|-----------------------------------------|-----------------------------|
| M005             | 2.54E+05                       | 2.10E+06                      | -835.402026                             | 0.21                        |
| M029             | 1.51E+05                       | 2.14E+06                      | -835.399485                             | 1.81                        |
| M047             | 1.54E+05                       | 2.02E+06                      | -835.400130                             | 1.40                        |
| M056             | 1.17E+05                       | 2.10E+06                      | -835.400313                             | 1.29                        |
| M032             | 2.58E+05                       | 2.50E+06                      | -835.402364                             | 0                           |
| M018             | 1.22E+06                       | 2.15E+06                      | -835.395691                             | 4.19                        |
| M021             | 1.52E+06                       | 2.82E+06                      | -835.396649                             | 3.59                        |
| M065             | 9.72E+05                       | 2.23E+06                      | -835.394663                             | 4.83                        |
| M075             | 1.14E+06                       | 2.98E+06                      | -835.395693                             | 4.19                        |
| M078             | 1.19E+06                       | 2.61E+06                      | -835.397479                             | 3.07                        |
| M123             | 1.85E+06                       | 2.88E+06                      | -835.395038                             | 4.60                        |
| M136             | 8.28E+05                       | 2.63E+06                      | -835.396288                             | 3.81                        |
| M151             | 1.31E+06                       | 2.54E+06                      | -835.396115                             | 3.92                        |
| M167             | 1.18E+06                       | 2.54E+06                      | -835.395784                             | 4.13                        |
| M168             | 1.06E+06                       | 2.55E+06                      | -835.395663                             | 4.20                        |
| M192             | 1.01E+06                       | 2.51E+06                      | -835.396118                             | 3.92                        |
| M252             | 1.41E+06                       | 2.96E+06                      | -835.393976                             | 5.26                        |
| M301             | 1.30E+06                       | 2.38E+06                      | -835.395021                             | 4.61                        |

1031  
1032 **Table S20** Conformers of the transition state for the C<sub>6</sub>H<sub>9</sub>O<sub>8</sub> 1,4 H-shift.  
1033

| Conformer number | Vibrational partition function | Rotational partition function | Electronic energy incl. ZPVE in Hartees | Relative energy in kcal/mol |
|------------------|--------------------------------|-------------------------------|-----------------------------------------|-----------------------------|
| M115             | 5.45E+05                       | 2.16E+06                      | -835.403992                             | 0.25                        |
| M120             | 7.18E+04                       | 1.75E+06                      | -835.399104                             | 3.32                        |
| M121             | 1.05E+05                       | 1.80E+06                      | -835.399993                             | 2.76                        |
| M124             | 1.18E+05                       | 2.01E+06                      | -835.397158                             | 4.54                        |
| M243             | 6.04E+04                       | 1.65E+06                      | -835.399997                             | 2.76                        |
| M303             | 7.32E+04                       | 1.64E+06                      | -835.398274                             | 3.84                        |
| M357             | 1.01E+05                       | 1.97E+06                      | -835.399749                             | 2.92                        |
| M019             | 1.57E+06                       | 2.62E+06                      | -835.403500                             | 0.56                        |
| M041             | 1.04E+06                       | 2.80E+06                      | -835.403439                             | 0.60                        |
| M058             | 1.26E+06                       | 2.74E+06                      | -835.403201                             | 0.75                        |
| M079             | 1.61E+06                       | 2.69E+06                      | -835.402632                             | 1.11                        |
| M097             | 1.04E+06                       | 2.80E+06                      | -835.403440                             | 0.60                        |
| M1093            | 9.11E+05                       | 2.41E+06                      | -835.403555                             | 0.53                        |
| M1133            | 9.85E+05                       | 2.41E+06                      | -835.402013                             | 1.49                        |
| M115             | 8.63E+05                       | 2.60E+06                      | -835.403361                             | 0.65                        |
| M120             | 1.01E+06                       | 2.72E+06                      | -835.403662                             | 0.46                        |
| M1321            | 8.65E+05                       | 2.05E+06                      | -835.402554                             | 1.16                        |
| M135             | 1.41E+06                       | 3.05E+06                      | -835.402690                             | 1.07                        |
| M1460            | 1.25E+06                       | 2.58E+06                      | -835.401592                             | 1.76                        |

|       |          |          |             |      |
|-------|----------|----------|-------------|------|
| M151  | 2.77E+06 | 2.81E+06 | -835.402635 | 1.10 |
| M160  | 2.94E+06 | 2.82E+06 | -835.400954 | 2.16 |
| M192  | 1.43E+06 | 2.79E+06 | -835.402486 | 1.20 |
| M1941 | 1.14E+06 | 2.58E+06 | -835.401703 | 1.69 |
| M202  | 1.65E+06 | 2.64E+06 | -835.401502 | 1.82 |
| M216  | 2.72E+06 | 3.07E+06 | -835.400985 | 2.14 |
| M222  | 1.22E+06 | 2.94E+06 | -835.402717 | 1.05 |
| M250  | 1.04E+06 | 2.70E+06 | -835.403205 | 0.75 |
| M267  | 3.08E+06 | 2.83E+06 | -835.401043 | 2.10 |
| M296  | 1.58E+06 | 2.62E+06 | -835.401378 | 1.89 |
| M301  | 1.21E+06 | 2.68E+06 | -835.403987 | 0.26 |
| M322  | 2.90E+06 | 3.08E+06 | -835.400978 | 2.14 |
| M354  | 4.21E+06 | 2.93E+06 | -835.402677 | 1.08 |
| M453  | 1.04E+06 | 2.80E+06 | -835.403441 | 0.60 |
| M456  | 1.78E+06 | 2.77E+06 | -835.401107 | 2.06 |
| M514  | 8.36E+05 | 2.50E+06 | -835.402797 | 1.00 |
| M548  | 1.63E+05 | 2.02E+06 | -835.402815 | 0.99 |
| M625  | 1.39E+06 | 2.73E+06 | -835.401975 | 1.52 |
| M701  | 1.70E+06 | 2.76E+06 | -835.401822 | 1.61 |
| M727  | 2.95E+05 | 2.01E+06 | -835.404395 | 0    |
| M758  | 9.63E+05 | 2.28E+06 | -835.403017 | 0.86 |
| M780  | 1.20E+06 | 2.49E+06 | -835.401164 | 2.03 |
| M838  | 7.57E+05 | 2.07E+06 | -835.402357 | 1.28 |
| M856  | 4.15E+06 | 2.54E+06 | -835.402584 | 1.14 |
| M931  | 8.32E+05 | 2.47E+06 | -835.401136 | 2.05 |
| M949  | 6.39E+05 | 2.09E+06 | -835.402406 | 1.25 |

1034  
1035  
1036

**Table 21** Conformers of the product for the C<sub>6</sub>H<sub>9</sub>O<sub>8</sub> 1,7 H-shift.

| Conformer number | Vibrational partition function | Rotational partition function | Electronic energy incl. ZPVE in Hartrees | Relative energy in kcal/mol |
|------------------|--------------------------------|-------------------------------|------------------------------------------|-----------------------------|
| M000             | 1.49E+06                       | 2.98E+06                      | -835.436576                              | 1.40                        |
| M003             | 1.44E+06                       | 3.13E+06                      | -835.437096                              | 1.07                        |
| M007             | 5.78E+05                       | 2.32E+06                      | -835.437399                              | 0.88                        |
| M010             | 1.02E+06                       | 3.04E+06                      | -835.436427                              | 1.49                        |
| M012             | 1.69E+06                       | 2.80E+06                      | -835.436149                              | 1.67                        |
| M015             | 5.75E+06                       | 3.17E+06                      | -835.435921                              | 1.81                        |
| M016             | 7.36E+05                       | 2.33E+06                      | -835.438204                              | 0.38                        |
| M017             | 7.36E+05                       | 2.33E+06                      | -835.438205                              | 0.38                        |
| M019             | 1.06E+06                       | 2.57E+06                      | -835.436976                              | 1.15                        |
| M023             | 2.00E+06                       | 3.01E+06                      | -835.436019                              | 1.75                        |
| M029             | 3.93E+06                       | 2.79E+06                      | -835.437333                              | 0.93                        |
| M039             | 2.22E+06                       | 3.23E+06                      | -835.438315                              | 0.31                        |
| M047             | 1.45E+06                       | 3.11E+06                      | -835.436338                              | 1.55                        |
| M063             | 1.58E+06                       | 2.80E+06                      | -835.436810                              | 1.25                        |



|      |          |          |             |      |
|------|----------|----------|-------------|------|
| M069 | 7.79E+05 | 2.67E+06 | -835.436754 | 1.29 |
| M070 | 1.25E+06 | 2.59E+06 | -835.437970 | 0.53 |
| M071 | 2.48E+06 | 3.09E+06 | -835.436656 | 1.35 |
| M072 | 6.51E+05 | 2.28E+06 | -835.438561 | 0.15 |
| M079 | 2.73E+06 | 2.95E+06 | -835.437986 | 0.52 |
| M080 | 8.16E+05 | 2.26E+06 | -835.436383 | 1.52 |
| M091 | 2.18E+06 | 2.92E+06 | -835.436527 | 1.43 |
| M099 | 3.94E+06 | 2.79E+06 | -835.437334 | 0.92 |
| M102 | 2.81E+06 | 3.01E+06 | -835.438007 | 0.50 |
| M110 | 2.28E+06 | 3.06E+06 | -835.436694 | 1.33 |
| M111 | 1.35E+06 | 2.75E+06 | -835.437382 | 0.89 |
| M113 | 9.47E+05 | 2.29E+06 | -835.437730 | 0.68 |
| M115 | 9.46E+05 | 2.29E+06 | -835.437729 | 0.68 |
| M130 | 4.64E+06 | 3.38E+06 | -835.437577 | 0.77 |
| M143 | 1.14E+06 | 2.31E+06 | -835.438808 | 0    |
| M144 | 4.75E+05 | 2.06E+06 | -835.438522 | 0.18 |
| M147 | 5.63E+05 | 2.16E+06 | -835.438226 | 0.37 |
| M153 | 2.20E+05 | 2.52E+06 | -835.436013 | 1.75 |
| M158 | 3.49E+05 | 2.45E+06 | -835.437600 | 0.76 |
| M159 | 1.35E+06 | 3.05E+06 | -835.435747 | 1.92 |
| M162 | 2.37E+05 | 2.38E+06 | -835.437695 | 0.70 |
| M163 | 2.00E+06 | 3.37E+06 | -835.436440 | 1.49 |
| M087 | 9.29E+05 | 2.35E+06 | -835.435830 | 1.87 |
| M097 | 1.80E+06 | 2.77E+06 | -835.435778 | 1.90 |
| M108 | 6.72E+05 | 2.35E+06 | -835.437630 | 0.74 |
| M113 | 1.34E+06 | 2.96E+06 | -835.434991 | 2.40 |
| M114 | 1.02E+06 | 2.91E+06 | -835.434771 | 2.53 |
| M119 | 2.98E+05 | 2.40E+06 | -835.437179 | 1.02 |
| M121 | 2.57E+06 | 2.72E+06 | -835.435209 | 2.26 |
| M123 | 2.57E+06 | 2.72E+06 | -835.435208 | 2.26 |
| M139 | 2.81E+06 | 3.01E+06 | -835.438008 | 0.50 |
| M147 | 3.45E+06 | 3.23E+06 | -835.436745 | 1.29 |
| M148 | 1.63E+05 | 2.44E+06 | -835.437511 | 0.81 |
| M151 | 1.45E+06 | 3.13E+06 | -835.437097 | 1.07 |
| M152 | 8.35E+05 | 2.34E+06 | -835.436421 | 1.50 |
| M155 | 4.02E+06 | 3.31E+06 | -835.434282 | 2.84 |
| M176 | 1.84E+05 | 2.19E+06 | -835.436641 | 1.36 |

1037  
1038  
1039

1040 **Table 22** Conformers of the product for the C<sub>6</sub>H<sub>9</sub>O<sub>8</sub> 1,6 H-shift.

| Conformer number | Vibrational partition function | Rotational partition function | Electronic energy incl. ZPVE in Hartrees | Relative energy in kcal/mol |
|------------------|--------------------------------|-------------------------------|------------------------------------------|-----------------------------|
| M113             | 1.11E+05                       | 1.79E+06                      | -835.43014                               | 0.24                        |
| M446             | 5.69E+05                       | 2.30E+06                      | -835.42949                               | 0.65                        |
| M454             | 1.26E+06                       | 2.30E+06                      | -835.42983                               | 0.43                        |
| M476             | 2.81E+06                       | 2.38E+06                      | -835.42758                               | 1.84                        |
| M478             | 8.00E+05                       | 2.24E+06                      | -835.42965                               | 0.55                        |
| M490             | 9.53E+05                       | 2.20E+06                      | -835.42922                               | 0.82                        |
| M026             | 2.64E+06                       | 2.32E+06                      | -835.42709                               | 2.15                        |
| M057             | 4.02E+06                       | 2.73E+06                      | -835.42862                               | 1.19                        |
| M1001            | 3.49E+06                       | 2.98E+06                      | -835.42934                               | 0.74                        |
| M1064            | 1.35E+05                       | 1.78E+06                      | -835.42896                               | 0.98                        |
| M1146            | 1.33E+06                       | 2.61E+06                      | -835.42941                               | 0.70                        |
| M1170            | 4.02E+06                       | 2.73E+06                      | -835.42862                               | 1.19                        |
| M1285            | 2.82E+06                       | 2.80E+06                      | -835.42970                               | 0.51                        |
| M1300            | 2.14E+05                       | 2.05E+06                      | -835.43052                               | 0                           |
| M1414            | 8.11E+06                       | 2.99E+06                      | -835.42920                               | 0.82                        |
| M1417            | 3.42E+06                       | 2.93E+06                      | -835.42923                               | 0.81                        |
| M150             | 1.08E+06                       | 2.22E+06                      | -835.42750                               | 1.89                        |
| M171             | 5.40E+06                       | 2.92E+06                      | -835.42793                               | 1.63                        |
| M1735            | 5.93E+06                       | 3.16E+06                      | -835.42754                               | 1.87                        |
| M173             | 2.82E+06                       | 2.72E+06                      | -835.42957                               | 0.59                        |
| M267             | 6.60E+05                       | 2.40E+06                      | -835.42955                               | 0.61                        |
| M321             | 5.56E+06                       | 2.68E+06                      | -835.42805                               | 1.55                        |
| M333             | 1.12E+06                       | 2.25E+06                      | -835.42742                               | 1.94                        |
| M398             | 4.11E+06                       | 3.25E+06                      | -835.42788                               | 1.66                        |
| M477             | 6.75E+06                       | 3.40E+06                      | -835.42840                               | 1.33                        |
| M492             | 2.83E+06                       | 2.72E+06                      | -835.42957                               | 0.59                        |
| M539             | 2.91E+06                       | 2.88E+06                      | -835.42844                               | 1.31                        |
| M790             | 4.13E+05                       | 1.81E+06                      | -835.42751                               | 1.89                        |
| M863             | 5.14E+06                       | 2.53E+06                      | -835.42802                               | 1.57                        |
| M903             | 3.08E+06                       | 2.61E+06                      | -835.42823                               | 1.44                        |
| M965             | 3.07E+06                       | 2.85E+06                      | -835.42801                               | 1.57                        |

1041

1042

1043

1044 **References that appear only in the SI:**

1045

1046 [91] Kürten, A.; Rondo, L.; Ehrhart, S.; Curtius J. *J. Phys. Chem. A* **2012**, *116*, 6375-6386.

1047 [92] Docherty, K. S.; Ziemann, P. J. *Aerosol Sci. Technol.* **2003**, *37*, 877-891.

1048 [93] Ziemann, P.; Atkinson, R. *Chem. Soc. Rev.* **2012**, *41*, 6582-6605.

1049 [94] Peeters, J.; Nguyen, T. L.; Vereecken, L. *Phys. Chem. Chem. Phys.* **2009**, *11*, 5935-5939.

1050 [95] Vereecken, L.; Peeters, J. *Phys. Chem. Chem. Phys.* **2010**, *12*, 12608-12620.

- 1051 [96] Scheer, A. M.; Welz, O.; Zádor, J.; Osborn, D. L.; Taatjes, C. A. *Phys. Chem. Chem. Phys.* **2014**, *16*, 13027-13040.
- 1052 [97] Lelieveld, J.; Butler, T. M.; Crowley, J. N.; Dillon, T. J.; Fischer, H.; Ganzeveld, L.; Harder, H.; Lawrence, M. G.;
- 1053 Martinez, M.; Taraborrelli, D.; Williams, J. *Nature*, **2008**, *452*, 737-740.
- 1054 [98] Fuchs, H.; Hofzumahaus, A.; Rohrer, F.; Bohn, B.; Brauers, T.; Dorn, H-P.; Häsel, R.; Holland, F.; Kaminski, M.;
- 1055 Li, X.; Lu, K.; Nehr, S.; Tillmann, R.; Wegener, R.; Wahner, A. *Nature Geo.* **2013**, *6*, 1023-1026.
- 1056 [99] Lockhart, J.; Blitz, M.; Heard, D.; Seakins, P.; Shannon, R. *J. Phys. Chem. A* **2013**, *117*, 11027-11037.
- 1057 [100] Lockhart, J.; Blitz, M. A.; Heard, D. E.; Seakins, P. W.; Shannon R. J. *J. Phys. Chem. A* **2013**, *117*, 5407-5418.
- 1058 [101] Peeters, J.; Müller, J. F. *Phys. Chem. Chem. Phys.* **2010**, *12*, 14227-14235.
- 1059 [102] Yu, T.; Truhlar, D. G. *Chem. Sci.* **2011**, *2*, 2199-2213.
- 1060 [103] Zheng, J.; Truhlar, D. G. *J. Chem. Theory and Comput.* **2013**, *9*, 1356-1367.
- 1061
